# Supplementary material for: AlleleShift: an R package to predict and visualize population-level changes in allele frequencies in response to climate change
Source: PeerJ journal article supplement (doi:10.7717/peerj.11534), 2021-06-15

# Population and individual genetic distance

Roeland Kindt

10/01/2021

## 1. Table of Contents

|                                                                                                                     |    |
|---------------------------------------------------------------------------------------------------------------------|----|
| Packages needed .....                                                                                               | 2  |
| Objective.....                                                                                                      | 2  |
| Load example data set.....                                                                                          | 2  |
| Distances among populations directly calculated from a genpop object.....                                           | 3  |
| Create the genpop object.....                                                                                       | 3  |
| Standardize the data so that each population has the same number of individuals.....                                | 4  |
| Distances among populations .....                                                                                   | 6  |
| Distances among populations without standardization .....                                                           | 6  |
| Distances among centroids of individuals.....                                                                       | 7  |
| Euclidean distances among individuals.....                                                                          | 7  |
| Principal Components Analysis .....                                                                                 | 7  |
| Comparison of distance matrices.....                                                                                | 8  |
| Locations of population centroids.....                                                                              | 9  |
| Comparison between directly calculated distances from the genpop object and the distances among the centroids ..... | 10 |
| Graphical comparison .....                                                                                          | 10 |
| Ordination of the populations with Principal Components Analysis of the genpop object .....                         | 10 |
| Ordination of the centroids .....                                                                                   | 11 |
| Flip the scores.....                                                                                                | 12 |
| Comparison between locations.....                                                                                   | 13 |
| Compare with common genetic distance measures for populations.....                                                  | 14 |
| Common distances.....                                                                                               | 14 |
| Distance-based redundancy analysis for the Rogers' distance .....                                                   | 14 |
| Procrustes analysis.....                                                                                            | 15 |
| Distance-based redundancy analysis for the Nei distance.....                                                        | 17 |

## 2. Packages needed

```
library(BiodiversityR) # also loads vegan
library(poppr) # also loads adegenet
library(AlleleShift)
```

## 3. Objective

Here I show how Euclidean distances among populations directly correspond to Euclidean distances among the Population centroids that are obtained from the Principal Component Analysis (PCA) scores of individuals.

## 4. Load example data set

The **AlleleShift** package contains a data set with allele counts for 902 individuals that belong to 19 populations.

```
data(Poptri.genind)
poppr::poppr(Poptri.genind)

##          Pop  N MLG eMLG  SE  H  G lambda  E.5  Hexp  Ia
## 1  Chilliwack 38 14 5.67 1.244 1.972 3.97 0.748 0.480 0.168 0.29948
## 2  Columbia 180 31 6.69 1.276 2.634 8.17 0.878 0.555 0.219 0.03214
## 3  Dean 7 4 4.00 0.000 1.352 3.77 0.735 0.967 0.145 -0.16667
## 4  Harrison 22 10 5.87 1.093 1.855 4.10 0.756 0.575 0.191 0.06387
## 5  Homathko 9 7 7.00 0.000 1.831 5.40 0.815 0.840 0.182 -0.17703
## 6  Kitimat 8 4 4.00 0.000 1.321 3.56 0.719 0.930 0.127 -0.13245
## 7  Klinaklini 8 5 5.00 0.000 1.494 4.00 0.750 0.868 0.155 -0.41248
## 8  Nisqually 14 7 5.51 0.830 1.567 3.38 0.704 0.627 0.157 0.00845
## 9  Nooksack 26 11 6.44 1.072 2.124 6.76 0.852 0.782 0.211 0.05709
## 10 Olympic_Penninsula 5 3 3.00 0.000 0.950 2.27 0.560 0.802 0.191 -0.25000
## 11 Puyallup 186 29 6.03 1.303 2.396 5.81 0.828 0.482 0.178 -0.02222
## 12 Salmon 11 7 6.64 0.481 1.846 5.76 0.826 0.892 0.193 -0.19978
## 13 Skagit 163 20 5.41 1.268 2.102 4.72 0.788 0.518 0.168 -0.01194
## 14 Skwawka 14 6 5.29 0.656 1.631 4.45 0.776 0.841 0.160 -0.04804
## 15 Skykomish 156 31 6.97 1.249 2.730 9.26 0.892 0.576 0.233 0.07931
## 16 Squamish 14 10 7.86 0.802 2.206 8.17 0.878 0.887 0.205 -0.28884
## 17 Tahoe 12 9 7.82 0.649 2.095 7.20 0.861 0.870 0.293 -0.11481
## 18 Vancouver I. East 12 4 3.50 0.584 0.837 1.71 0.417 0.546 0.107 0.48361
## 19 Willamette 17 10 6.65 1.016 2.007 5.45 0.817 0.691 0.246 0.11902
## 20 Total 902 59 6.38 1.323 2.663 6.93 0.856 0.445 0.200 0.03621
##          rbarD          File
## 1  0.08166 Poptri.genind
## 2  0.00883 Poptri.genind
## 3 -0.16667 Poptri.genind
## 4  0.02067 Poptri.genind
## 5 -0.04770 Poptri.genind
## 6 -0.14222 Poptri.genind
## 7 -0.21444 Poptri.genind
## 8  0.00445 Poptri.genind
## 9  0.01646 Poptri.genind
## 10 -0.25000 Poptri.genind
## 11 -0.00606 Poptri.genind
## 12 -0.07663 Poptri.genind
## 13 -0.00373 Poptri.genind
```

```
## 14 -0.01849 Poptri.genind
## 15 0.02249 Poptri.genind
## 16 -0.08273 Poptri.genind
## 17 -0.03060 Poptri.genind
## 18 0.27081 Poptri.genind
## 19 0.04139 Poptri.genind
## 20 0.00998 Poptri.genind
```

## 5. Distances among populations directly calculated from a genpop object

### 5.1. Create the genpop object

```
Poptri.genpop <- genind2genpop(Poptri.genind)

##
## Converting data from a genind to a genpop object...
##
## ...done.

Poptri.genpop

## /// GENPOP OBJECT ///////////
##
## // 19 populations; 5 loci; 10 alleles; size: 8 Kb
##
## // Basic content
## @tab: 19 x 10 matrix of allele counts
## @loc.n.all: number of alleles per locus (range: 2-2)
## @loc.fac: locus factor for the 10 columns of @tab
## @all.names: list of allele names for each locus
## @ploidy: ploidy of each individual (range: 2-2)
## @type: codom
## @call: genind2genpop(x = Poptri.genind)
##
## // Optional content
## - empty -

adegenet::makefreq(Poptri.genpop)

##
## Finding allelic frequencies from a genpop object...
##
## ...done.

##
## X01_10838495.1 X01_10838495.2 X01_16628872.1 X01_16628872.2
## Chilliwack 0.10526316 0.8947368 0.19736842 0.8026316
## Columbia 0.23055556 0.7694444 0.20000000 0.8000000
## Dean 0.21428571 0.7857143 0.00000000 1.0000000
## Harrison 0.15909091 0.8409091 0.25000000 0.7500000
## Homathko 0.05555556 0.9444444 0.22222222 0.7777778
## Kitimat 0.25000000 0.7500000 0.12500000 0.8750000
## Klinaklini 0.06250000 0.9375000 0.43750000 0.5625000
## Nisqually 0.10714286 0.8928571 0.25000000 0.7500000
## Nooksack 0.17307692 0.8269231 0.26923077 0.7307692
## Olympic_Penninsula 0.50000000 0.5000000 0.10000000 0.9000000
## Puyallup 0.17204301 0.8279570 0.16935484 0.8306452
## Salmon 0.04545455 0.9545455 0.27272727 0.7272727
## Skagit 0.23619632 0.7638037 0.18098160 0.8190184
```

|                       |                |                |                |                |
|-----------------------|----------------|----------------|----------------|----------------|
| ## Skwawka            | 0.03571429     | 0.9642857      | 0.32142857     | 0.6785714      |
| ## Skykomish          | 0.20192308     | 0.7980769      | 0.31410256     | 0.6858974      |
| ## Squamish           | 0.28571429     | 0.7142857      | 0.25000000     | 0.7500000      |
| ## Tahoe              | 0.62500000     | 0.3750000      | 0.08333333     | 0.9166667      |
| ## Vancouver I. East  | 0.16666667     | 0.8333333      | 0.00000000     | 1.0000000      |
| ## Willamette         | 0.35294118     | 0.6470588      | 0.20588235     | 0.7941176      |
| ##                    | X01_23799134.1 | X01_23799134.2 | X01_38900650.1 | X01_38900650.2 |
| ## Chilliwack         | 0.06578947     | 0.9342105      | 0.05263158     | 0.9473684      |
| ## Columbia           | 0.10833333     | 0.8916667      | 0.06944444     | 0.9305556      |
| ## Dean               | 0.00000000     | 1.0000000      | 0.21428571     | 0.7857143      |
| ## Harrison           | 0.11363636     | 0.8863636      | 0.02272727     | 0.9772727      |
| ## Homathko           | 0.05555556     | 0.9444444      | 0.05555556     | 0.9444444      |
| ## Kitimat            | 0.00000000     | 1.0000000      | 0.00000000     | 1.0000000      |
| ## Klinaklini         | 0.00000000     | 1.0000000      | 0.00000000     | 1.0000000      |
| ## Nisqually          | 0.00000000     | 1.0000000      | 0.00000000     | 1.0000000      |
| ## Nooksack           | 0.01923077     | 0.9807692      | 0.07692308     | 0.9230769      |
| ## Olympic_Penninsula | 0.00000000     | 1.0000000      | 0.00000000     | 1.0000000      |
| ## Puyallup           | 0.04569892     | 0.9543011      | 0.05107527     | 0.9489247      |
| ## Salmon             | 0.00000000     | 1.0000000      | 0.04545455     | 0.9545455      |
| ## Skagit             | 0.03987730     | 0.9601227      | 0.01840491     | 0.9815951      |
| ## Skwawka            | 0.07142857     | 0.9285714      | 0.00000000     | 1.0000000      |
| ## Skykomish          | 0.11217949     | 0.8878205      | 0.03525641     | 0.9647436      |
| ## Squamish           | 0.03571429     | 0.9642857      | 0.03571429     | 0.9642857      |
| ## Tahoe              | 0.04166667     | 0.9583333      | 0.41666667     | 0.5833333      |
| ## Vancouver I. East  | 0.00000000     | 1.0000000      | 0.08333333     | 0.9166667      |
| ## Willamette         | 0.00000000     | 1.0000000      | 0.14705882     | 0.8529412      |
| ##                    | X01_41284594.1 | X01_41284594.2 |                |                |
| ## Chilliwack         | 0.05263158     | 0.9473684      |                |                |
| ## Columbia           | 0.05000000     | 0.9500000      |                |                |
| ## Dean               | 0.00000000     | 1.0000000      |                |                |
| ## Harrison           | 0.02272727     | 0.9772727      |                |                |
| ## Homathko           | 0.11111111     | 0.8888889      |                |                |
| ## Kitimat            | 0.00000000     | 1.0000000      |                |                |
| ## Klinaklini         | 0.06250000     | 0.9375000      |                |                |
| ## Nisqually          | 0.10714286     | 0.8928571      |                |                |
| ## Nooksack           | 0.09615385     | 0.9038462      |                |                |
| ## Olympic_Penninsula | 0.10000000     | 0.9000000      |                |                |
| ## Puyallup           | 0.07526882     | 0.9247312      |                |                |
| ## Salmon             | 0.22727273     | 0.7727273      |                |                |
| ## Skagit             | 0.03374233     | 0.9662577      |                |                |
| ## Skwawka            | 0.07142857     | 0.9285714      |                |                |
| ## Skykomish          | 0.07692308     | 0.9230769      |                |                |
| ## Squamish           | 0.03571429     | 0.9642857      |                |                |
| ## Tahoe              | 0.12500000     | 0.8750000      |                |                |
| ## Vancouver I. East  | 0.04166667     | 0.9583333      |                |                |
| ## Willamette         | 0.08823529     | 0.9117647      |                |                |

## 5.2. Standardize the data so that each population has the same number of individuals

Data needs to be standardized so that each population has the same number of individuals. If not, the same problem emerges where abundance differences influence the results as in the analysis of differences in species composition through the Euclidean distances that is explained for Figure 8.2 for the **Tree Diversity Analysis** community ecology and biodiversity analysis manual (Kindt and Coe 2005).

Data would also be standardized through argument **scale=TRUE** in **vegan::rda**. But here I use the same standardization pathway that I use in **AlleleShift::count.model**.

The below script standardizes the data so that each population has 186 individuals and 372 alleles. The number of 186 individuals corresponds to the number of individuals in the Puyallup population.

```
gen.comm <- data.frame(Poptri.genpop@tab)

scale2 <- max(rowSums(gen.comm))
scale2/10 # 5 Loci with 2 alleles each

## [1] 186

row.ratios <- rowSums(gen.comm) / max(rowSums(gen.comm))
gen.comm.b <- gen.comm
for (i in 1:nrow(gen.comm)) {gen.comm.b[i, ] <- gen.comm[i, ] / row.ratios[i]}

rowSums(gen.comm.b[, c(1:2)])

##      Chilliwack      Columbia      Dean      Harrison
##      372          372          372          372
##      Homathko      Kitimat      Klinaklini      Nisqually
##      372          372          372          372
##      Nooksack Olympic_Penninsula      Puyallup      Salmon
##      372          372          372          372
##      Skagit      Skwawka      Skykomish      Squamish
##      372          372          372          372
##      Tahoe Vancouver I. East      Willamette
##      372          372          372

rowSums(gen.comm.b[, c(3:4)])

##      Chilliwack      Columbia      Dean      Harrison
##      372          372          372          372
##      Homathko      Kitimat      Klinaklini      Nisqually
##      372          372          372          372
##      Nooksack Olympic_Penninsula      Puyallup      Salmon
##      372          372          372          372
##      Skagit      Skwawka      Skykomish      Squamish
##      372          372          372          372
##      Tahoe Vancouver I. East      Willamette
##      372          372          372

rowSums(gen.comm.b[, c(5:6)])

##      Chilliwack      Columbia      Dean      Harrison
##      372          372          372          372
##      Homathko      Kitimat      Klinaklini      Nisqually
##      372          372          372          372
##      Nooksack Olympic_Penninsula      Puyallup      Salmon
##      372          372          372          372
##      Skagit      Skwawka      Skykomish      Squamish
##      372          372          372          372
##      Tahoe Vancouver I. East      Willamette
##      372          372          372

rowSums(gen.comm.b[, c(7:8)])
```

```
##      Chilliwack      Columbia      Dean      Harrison
##      372            372            372            372
##      Homathko      Kitimat      Klinaklini      Nisqually
##      372            372            372            372
##      Nooksack Olympic_Penninsula      Puyallup      Salmon
##      372            372            372            372
##      Skagit      Skwawka      Skykomish      Squamish
##      372            372            372            372
##      Tahoe Vancouver I. East      Willamette
##      372            372            372
```

```
rowSums(gen.comm.b[, c(9:10)])
```

```
##      Chilliwack      Columbia      Dean      Harrison
##      372            372            372            372
##      Homathko      Kitimat      Klinaklini      Nisqually
##      372            372            372            372
##      Nooksack Olympic_Penninsula      Puyallup      Salmon
##      372            372            372            372
##      Skagit      Skwawka      Skykomish      Squamish
##      372            372            372            372
##      Tahoe Vancouver I. East      Willamette
##      372            372            372
```

### 5.3. Distances among populations

Now the Euclidean distances among the populations can be calculated.

```
baseline.dist.scaled <- vegdist(gen.comm.b, method="euclidean")
as.matrix(baseline.dist.scaled)[1:7, 1:7]
```

```
##      Chilliwack Columbia      Dean Harrison Homathko Kitimat
## Chilliwack  0.00000  70.19806 152.5387  51.93464  42.80974  99.89341
## Columbia   70.19806  0.00000 144.5351  54.06585 102.32609  83.28436
## Dean       152.53870 144.53511  0.0000  178.92454 178.56414 131.85695
## Harrison   51.93464  54.06585 178.9245  0.00000  81.08227 102.33144
## Homathko   42.80974 102.32609 178.5641  81.08227  0.00000 134.92817
## Kitimat    99.89341  83.28436 131.8569 102.33144 134.92817  0.00000
## Klinaklini 135.85651 167.49406 270.4467 128.32401 123.29836 194.52346
##      Klinaklini
## Chilliwack  135.8565
## Columbia   167.4941
## Dean       270.4467
## Harrison   128.3240
## Homathko   123.2984
## Kitimat    194.5235
## Klinaklini  0.0000
```

### 5.4. Distances among populations without standardization

In case the data is not standardized, then the calculations show that population Chilliwack is closer to Dean (distance: 126.8) than to Columbia (distance: 557.2). The opposite is the case in the calculations with the standardized distances directly above. Compare also with the results of section with the Rogers' and Nei distances of section 8.1, where distance Chilliwack-Columbia < Chilliwack-Dean as with the standardized data.

```
baseline.dist2 <- vegdist(Poptri.genpop@tab, method="euclidean")
as.matrix(baseline.dist2)[1:7, 1:7]
```

```
##          Chilliwack Columbia      Dean Harrison Homathko      Kitimat
## Chilliwack  0.00000 557.1768 126.822711 66.97761 118.68446 122.000000
## Columbia   557.17681  0.0000 683.047583 623.16290 675.36361 678.213831
## Dean        126.82271 683.0476  0.000000 60.77829 10.67708 6.928203
## Harrison    66.97761 623.1629 60.778286  0.00000 52.45951 55.587768
## Homathko    118.68446 675.3636 10.677078 52.45951  0.00000 6.782330
## Kitimat     122.00000 678.2138 6.928203 55.58777 6.78233  0.000000
## Klinaklini 122.82508 679.3997 11.575837 56.39149 6.63325 8.366600
##           Klinaklini
## Chilliwack 122.82508
## Columbia   679.39974
## Dean        11.57584
## Harrison    56.39149
## Homathko    6.63325
## Kitimat     8.36660
## Klinaklini  0.00000
```

## 6. Distances among centroids of individuals

### 6.1. Euclidean distances among individuals

```
ind.distA <- as.matrix(vegdist(Poptri.genind@tab,
                              method="euclidean"))[1:7, 1:7]
```

```
ind.distA
```

```
##          BESC-52 BESC-79 BESC-246 CA-05-06 BESC-460 GW-10958 DENA-17-3
## BESC-52  0.000000 0.000000 0.000000 3.741657 0.000000 1.414214 1.414214
## BESC-79  0.000000 0.000000 0.000000 3.741657 0.000000 1.414214 1.414214
## BESC-246 0.000000 0.000000 0.000000 3.741657 0.000000 1.414214 1.414214
## CA-05-06 3.741657 3.741657 3.741657 0.000000 3.741657 3.464102 3.464102
## BESC-460 0.000000 0.000000 0.000000 3.741657 0.000000 1.414214 1.414214
## GW-10958 1.414214 1.414214 1.414214 3.464102 1.414214 0.000000 2.000000
## DENA-17-3 1.414214 1.414214 1.414214 3.464102 1.414214 2.000000 0.000000
```

### 6.2. Principal Components Analysis

As shown in my publication on [Analysis of Molecular Variance \(AMOVA\) with vegan and BiodiversityR, including a graphical method to identify potential migrants](#), function **BiodiversityR::caprescale** provides details on different methods of obtaining sums-of-squares from **vegan::capscale** results. With the Euclidean distance, function **vegan::capscale** results in the same configuration as **vegan::rda** that directly calculates a Principal Component Analysis.

```
ind.pca <- caprescale(capscale(Poptri.genind@tab ~ 1,
                              method="euclidean"),
                    verbose=TRUE)
```

```
## SSTot obtained from sum of all eigenvalues: 2177.718
## SSTot obtained from sum of all positive eigenvalues: 2177.718
## SSTot reflected by distances among site scores on all axes: 2177.718
```

```
ind.pca
```

```
## Call: caprescale(formula = Poptri.genind@tab ~ 1, method = "euclidean")
##
##           Inertia Rank
```

```

## Total          2.417
## Unconstrained  2.417    5
## Inertia is mean squared Euclidean distance
## Species scores projected from '@' 'Poptri.genind' 'tab'
##
## Eigenvalues for unconstrained axes:
##   MDS1  MDS2  MDS3  MDS4  MDS5
## 1.0639 0.6884 0.2356 0.2242 0.2049

n.axes <- length(ind.pca$CA$eig)
n.axes

## [1] 5

ind.pca.summary <- summary(ind.pca, scaling=1)

# Relationship between inertia and SSTot
ind.pca$tot.chi * (nrow(Poptri.genind@tab) - 1)

## [1] 2177.718

ind.scores <- summary(ind.pca,
                      axes=n.axes,
                      scaling=1)$sites

```

### 6.3. Comparison of distance matrices

As expected, the distances among the individuals in PCA / caprescale space correspond to the distances of the Euclidean distance matrix.

```

ind.distB <- as.matrix(vegdist(ind.scores,
                              method="euclidean"))[1:7, 1:7]

ind.distB

##           BESC-52      BESC-79      BESC-246 CA-05-06      BESC-460 GW-10958
## BESC-52  0.000000e+00  1.819315e-13  6.997107e-14  3.741657  1.678682e-14  1.414214
## BESC-79  1.819315e-13  0.000000e+00  1.942472e-13  3.741657  1.783605e-13  1.414214
## BESC-246 6.997107e-14  1.942472e-13  0.000000e+00  3.741657  6.808976e-14  1.414214
## CA-05-06 3.741657e+00  3.741657e+00  3.741657e+00  0.000000  3.741657e+00  3.464102
## BESC-460 1.678682e-14  1.783605e-13  6.808976e-14  3.741657  0.000000e+00  1.414214
## GW-10958 1.414214e+00  1.414214e+00  1.414214e+00  3.464102  1.414214e+00  0.000000
## DENA-17-3 1.414214e+00  1.414214e+00  1.414214e+00  3.464102  1.414214e+00  2.000000
##
##           DENA-17-3
## BESC-52      1.414214
## BESC-79      1.414214
## BESC-246     1.414214
## CA-05-06     3.464102
## BESC-460     1.414214
## GW-10958     2.000000
## DENA-17-3    0.000000

# Distances calculated earlier in the distance matrix
round(ind.distA,
      digits=6)[1:7, 1:7]

##           BESC-52  BESC-79  BESC-246  CA-05-06  BESC-460  GW-10958  DENA-17-3
## BESC-52  0.000000  0.000000  0.000000  3.741657  0.000000  1.414214  1.414214
## BESC-79  0.000000  0.000000  0.000000  3.741657  0.000000  1.414214  1.414214
## BESC-246 0.000000  0.000000  0.000000  3.741657  0.000000  1.414214  1.414214

```



```
## CA-05-06 3.741657 3.741657 3.741657 0.000000 3.741657 3.464102 3.464102
## BESC-460 0.000000 0.000000 0.000000 3.741657 0.000000 1.414214 1.414214
## GW-10958 1.414214 1.414214 1.414214 3.464102 1.414214 0.000000 2.000000
## DENA-17-3 1.414214 1.414214 1.414214 3.464102 1.414214 2.000000 0.000000

# easier to see the differences among the individuals in ordination space by rounding
round(ind.distB,
      digits=6)[1:7, 1:7]

##          BESC-52 BESC-79 BESC-246 CA-05-06 BESC-460 GW-10958 DENA-17-3
## BESC-52 0.000000 0.000000 0.000000 3.741657 0.000000 1.414214 1.414214
## BESC-79 0.000000 0.000000 0.000000 3.741657 0.000000 1.414214 1.414214
## BESC-246 0.000000 0.000000 0.000000 3.741657 0.000000 1.414214 1.414214
## CA-05-06 3.741657 3.741657 3.741657 0.000000 3.741657 3.464102 3.464102
## BESC-460 0.000000 0.000000 0.000000 3.741657 0.000000 1.414214 1.414214
## GW-10958 1.414214 1.414214 1.414214 3.464102 1.414214 0.000000 2.000000
## DENA-17-3 1.414214 1.414214 1.414214 3.464102 1.414214 2.000000 0.000000

all.equal(target=ind.distA,
          current=ind.distB)

## [1] TRUE
```

## 6.4. Locations of population centroids

The locations of the centroids are calculate as average of the scores of the individuals on each axis.

```
pop.centroids <- stats::aggregate(ind.scores ~ Poptri.genind@pop, FUN=mean)
pop.centroids <- data.frame(pop.centroids)
rownames(pop.centroids) <- pop.centroids[, 1]
pop.centroids <- pop.centroids[, -1]

pop.distB <- vegdist(pop.centroids, method="euclidean")
as.matrix(pop.distB)[1:7, 1:7]

##          Chilliwack Columbia      Dean Harrison Homathko Kitimat
## Chilliwack 0.000000 0.3774089 0.8201005 0.2792185 0.2301599 0.5370614
## Columbia   0.3774089 0.0000000 0.7770705 0.2906766 0.5501403 0.4477654
## Dean        0.8201005 0.7770705 0.0000000 0.9619599 0.9600223 0.7089083
## Harrison    0.2792185 0.2906766 0.9619599 0.0000000 0.4359262 0.5501690
## Homathko    0.2301599 0.5501403 0.9600223 0.4359262 0.0000000 0.7254203
## Kitimat     0.5370614 0.4477654 0.7089083 0.5501690 0.7254203 0.0000000
## Klinaklini 0.7304113 0.9005057 1.4540145 0.6899141 0.6628944 1.0458250
##          Klinaklini
## Chilliwack 0.7304113
## Columbia   0.9005057
## Dean        1.4540145
## Harrison    0.6899141
## Homathko    0.6628944
## Kitimat     1.0458250
## Klinaklini 0.0000000
```

## 7. Comparison between directly calculated distances from the `genpop` object and the distances among the centroids

It can be seen now that the Euclidean distances among the centroids directly reflect the distances among the populations. The ratio between the two reflects that ratio that was used to standardize the `genind@tab` slot.

```
pop.distC <- as.matrix(baseline.dist.scaled) / as.matrix(pop.distB)
pop.distC[1:7, 1:7]

##           Chilliwack Columbia Dean Harrison Homathko Kitimat Klinaklini
## Chilliwack           NaN      186 186      186      186      186      186
## Columbia             186      NaN 186      186      186      186      186
## Dean                 186      186 NaN      186      186      186      186
## Harrison             186      186 186      NaN      186      186      186
## Homathko             186      186 186      186      NaN      186      186
## Kitimat              186      186 186      186      186      NaN      186
## Klinaklini          186      186 186      186      186      186      NaN

max(rowSums(gen.comm.b))/10

## [1] 186
```

## 8. Graphical comparison

### 8.1. Ordination of the populations with Principal Components Analysis of the `genpop` object

```
pca1.balanced <- rda(gen.comm.b ~ 1)
plot1 <- ordiplot(pca1.balanced, display="sites")
text(plot1, what="sites", col="red", cex=0.6)
```

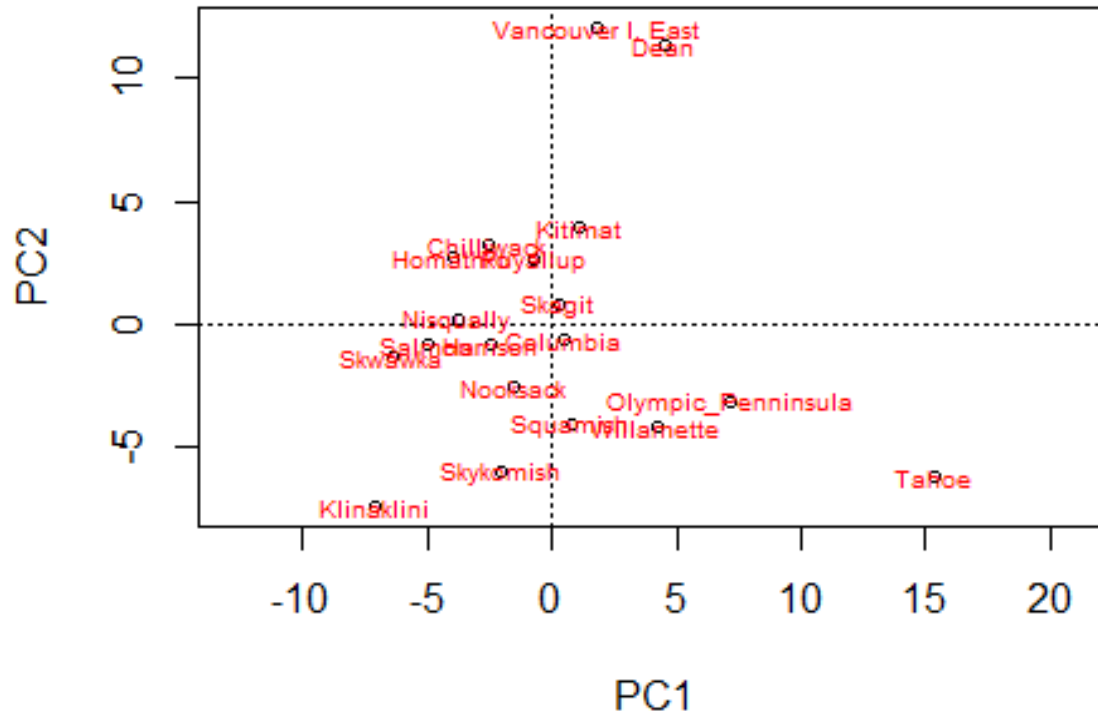

## 8.2. Ordination of the centroids

```
pca2 <- rda(pop.centroids~1)
plot2 <- ordiplot(pca2, display="sites")
text(plot2, what="sites", col="red", cex=0.6)
```

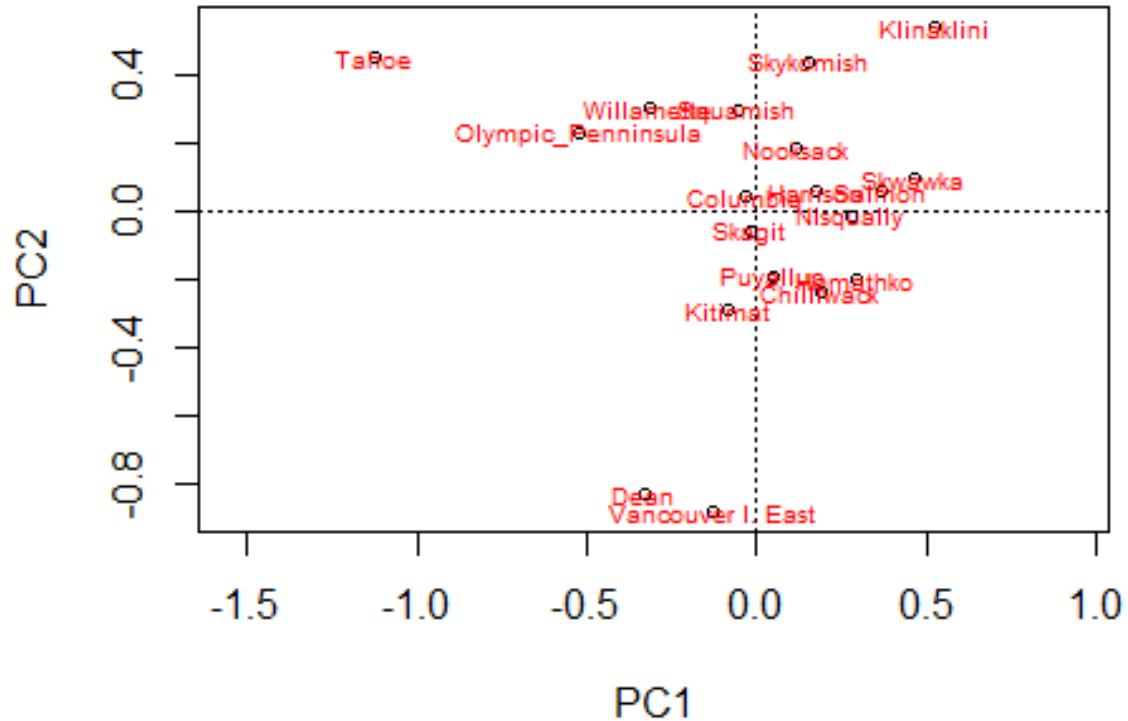

### 8.3. Flip the scores

As it happens, the locations for the centroids mirror the locations of the first ordination diagram. Obviously, the distances are the same, but it is easier to see that the same configuration is obtained by multiplying positions by -1.

```
pca3 <- pca2
pca3$CA$u[, c(1:2)] <- -1* pca3$CA$u[, c(1,2)]

plot3 <- ordiplot(pca3, display="sites")
text(plot3, what="sites", col="red", cex=0.6)
```

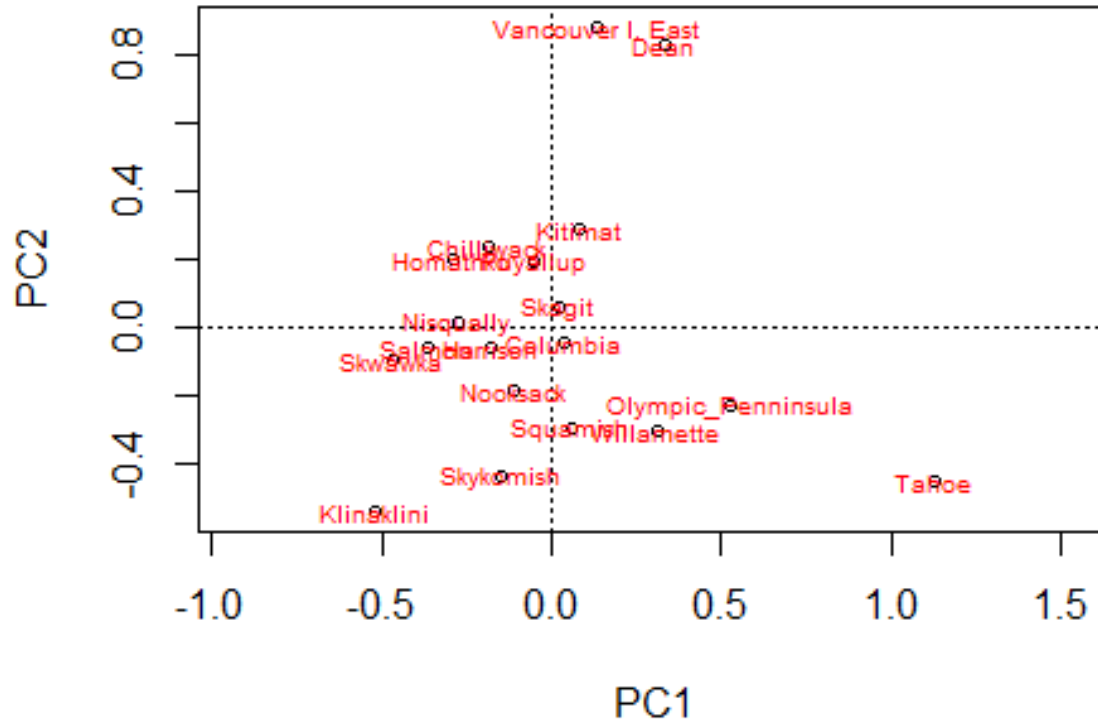

### 8.4. Comparison between locations

```

scores.plot1 <- data.frame(scores(plot1))
dist.plot1 <- vegdist(rbind(scores.plot1, c(0,0)), method="euc")
arrows.plot1 <- as.matrix(dist.plot1)[, 20]

scores.plot2 <- data.frame(scores(plot2))
dist.plot2 <- vegdist(rbind(scores.plot2, c(0,0)), method="euc")
arrows.plot2 <- as.matrix(dist.plot2)[, 20]

# Length of arrow reflect the sums-of-squares
(arrows.plot1/arrows.plot2)^2

##      Chilliwack      Columbia      Dean      Harrison
##          186          186          186          186
##      Homathko      Kitimat      Klinaklini      Nisqually
##          186          186          186          186
##      Nooksack      Olympic_Penninsula      Puyallup      Salmon
##          186          186          186          186
##      Skagit      Skwawka      Skykomish      Squamish
##          186          186          186          186
##      Tahoe      Vancouver I. East      Willamette      20
##          186          186          186          NaN

```

## 9. Compare with common genetic distance measures for populations

### 9.1. Common distances

```
# Euclidean
# method 4: Classical Euclidean distance or Rogers' distance (Euclidean):
Pop.genetic4 <- dist.genpop(Poptri.genpop, method=4)
as.matrix(Pop.genetic4)[1:7, 1:7]

##          Chilliwack  Columbia      Dean  Harrison  Homathko  Kitimat
## Chilliwack 0.00000000 0.03798246 0.1172932 0.04282297 0.02923977 0.07763158
## Columbia   0.03798246 0.00000000 0.1038889 0.04015152 0.06500000 0.06444444
## Dean        0.11729323 0.10388889 0.0000000 0.12662338 0.14126984 0.07500000
## Harrison    0.04282297 0.04015152 0.1266234 0.00000000 0.06212121 0.07500000
## Homathko    0.02923977 0.06500000 0.1412698 0.06212121 0.00000000 0.10277778
## Kitimat     0.07763158 0.06444444 0.0750000 0.07500000 0.10277778 0.00000000
## Klinaklini 0.08223684 0.11916667 0.1732143 0.09204545 0.07638889 0.11250000
##           Klinaklini
## Chilliwack 0.08223684
## Columbia   0.11916667
## Dean        0.17321429
## Harrison    0.09204545
## Homathko    0.07638889
## Kitimat     0.11250000
## Klinaklini 0.00000000

# Nei
Pop.genetic1 <- dist.genpop(Poptri.genpop, method=1)
as.matrix(Pop.genetic1)[1:7, 1:7]

##          Chilliwack  Columbia      Dean  Harrison  Homathko
## Chilliwack 0.00000000 0.003879964 0.01981765 0.002286651 0.001587381
## Columbia   0.003879964 0.000000000 0.01720830 0.002452464 0.009020503
## Dean        0.019817649 0.017208300 0.00000000 0.027470664 0.027347413
## Harrison    0.002286651 0.002452464 0.02747066 0.000000000 0.005762475
## Homathko    0.001587381 0.009020503 0.02734741 0.005762475 0.000000000
## Kitimat     0.008069536 0.004246348 0.01444974 0.008169170 0.015031708
## Klinaklini 0.015846263 0.024091968 0.06340895 0.014063820 0.013018216
##           Kitimat Klinaklini
## Chilliwack 0.008069536 0.01584626
## Columbia   0.004246348 0.02409197
## Dean        0.014449739 0.06340895
## Harrison    0.008169170 0.01406382
## Homathko    0.015031708 0.01301822
## Kitimat     0.000000000 0.03189297
## Klinaklini 0.031892967 0.00000000
```

### 9.2. Distance-based redundancy analysis for the Rogers' distance

```
cap4 <- caprescale(capscale(Pop.genetic4 ~ 1, method = "euclidean"), verbose=TRUE)

## SSTot obtained from sum of all eigenvalues: 0.1173376
## SSTot obtained from sum of all positive eigenvalues: 0.1173376
## SSTot reflected by distances among site scores on all axes: 0.1173376

cap4

## Call: capscale(formula = Pop.genetic4 ~ 1, method = "euclidean")
##
```



```

## protest(X = plot4, Y = plot1)
##
## Procrustes Sum of Squares (m12 squared):      0.219
## Correlation in a symmetric Procrustes rotation: 0.8837
## Significance: 0.001
##
## Permutation: free
## Number of permutations: 999

plot5 <- plot(protest(plot2, plot4))
plot5

## $heads
##
##          PC1      PC2
## Chilliwack    0.081622945 -0.103680404
## Columbia     -0.014097079  0.018917125
## Dean         -0.143018530 -0.359889639
## Harrison      0.076087744  0.025578830
## Homathko      0.127200758 -0.085578521
## Kitimat      -0.035348193 -0.124547232
## Klinaklini    0.226089938  0.234665093
## Nisqually     0.120194585 -0.006680199
## Nooksack      0.049745872  0.080578518
## Olympic_Penninsula -0.226502487  0.100197900
## Puyallup      0.021948913 -0.083342967
## Salmon       0.158300579  0.024584125
## Skagit       -0.008402801 -0.025690623
## Skwawka       0.202702758  0.042716854
## Skykomish     0.065911813  0.188586871
## Squamish     -0.024357377  0.128530361
## Tahoe        -0.486879254  0.196409095
## Vancouver I. East -0.055871554 -0.382534234
## Willamette   -0.135328629  0.131179046
##
## $points
##
##          [,1]      [,2]
## Chilliwack    6.062673e-02 -0.02677223
## Columbia     -1.949251e-05 -0.07292452
## Dean         -1.314208e-01 -0.38240859
## Harrison      9.393378e-02 -0.09065576
## Homathko      7.398650e-02  0.11786002
## Kitimat      -3.169061e-02 -0.14920226
## Klinaklini    2.051029e-01  0.04352612
## Nisqually     8.425502e-02  0.08482816
## Nooksack      3.416038e-02  0.03386092
## Olympic_Penninsula -1.785315e-01  0.18209606
## Puyallup      1.030318e-03 -0.01465238
## Salmon       1.413038e-01  0.15944709
## Skagit       -9.093599e-03 -0.06089063
## Skwawka       1.728100e-01  0.10919774
## Skykomish     8.091830e-02  0.02978173
## Squamish     -2.048428e-03  0.02604088
## Tahoe        -4.495500e-01  0.18255896
## Vancouver I. East -3.513257e-02 -0.25840390
## Willamette   -1.106407e-01  0.08671259
##
## attr(,"class")
## [1] "ordiplot"

text(plot5, what="points", col="red", cex=0.6)

```



## Procrustes errors

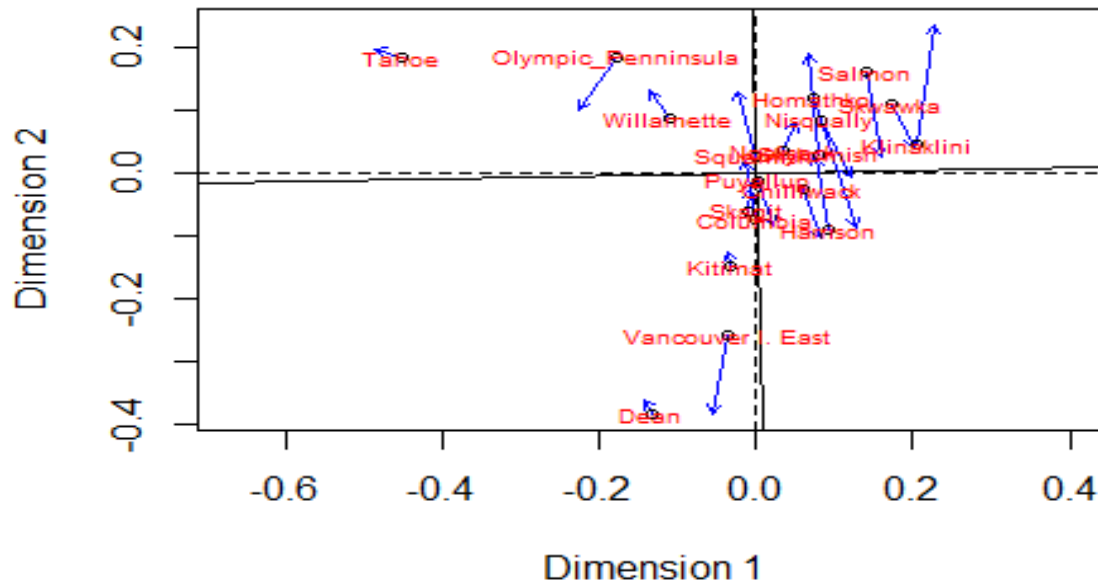

### 9.4. Distance-based redundancy analysis for the Nei distance

```
cap1 <- caprescale(capscale(Pop.genetic1 ~ 1, method = "euclidean"), verbose=TRUE)
```

```
## SSTot obtained from sum of all eigenvalues: 0.02462873
```

```
## SSTot obtained from sum of all positive eigenvalues: 0.02462873
```

```
## SSTot reflected by distances among site scores on all axes: 0.02462873
```

```
cap1
```

```
## Call: capscale(formula = Pop.genetic1 ~ 1, method = "euclidean")
```

```
##
```

```
## Inertia Rank
```

```
## Total 0.01426
```

```
## Unconstrained 0.02463 5
```

```
## Imaginary -0.01037 13
```

```
## Inertia is squared Nei distance
```

```
##
```

```
## Eigenvalues for unconstrained axes:
```

```
## MDS1 MDS2 MDS3 MDS4 MDS5
```

```
## 0.022773 0.001215 0.000431 0.000179 0.000031
```

```
plot5 <- ordiplot(cap1, display="sites")
```

```
text(plot5, what="sites", col="red", cex=0.6)
```

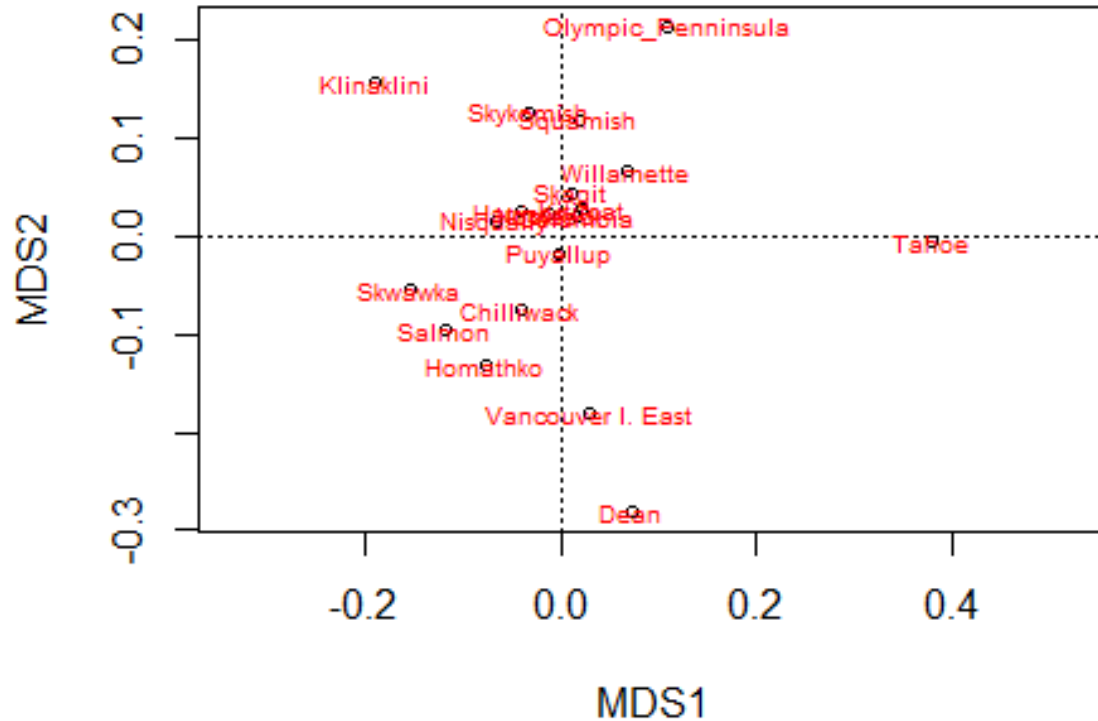

### Procrustes analysis

```

protest(plot5, plot1)

##
## Call:
## protest(X = plot5, Y = plot1)
##
## Procrustes Sum of Squares (m12 squared):      0.1985
## Correlation in a symmetric Procrustes rotation: 0.8953
## Significance: 0.001
##
## Permutation: free
## Number of permutations: 999

plot6 <- plot(protest(plot2, plot5))
plot6

## $heads
##           PC1      PC2
## Chilliwack  0.081622945 -0.103680404
## Columbia   -0.014097079  0.018917125
## Dean        -0.143018530 -0.359889639
## Harrison    0.076087744  0.025578830
## Homathko    0.127200758 -0.085578521
## Kitimat     -0.035348193 -0.124547232

```

```

## Klinaklini      0.226089938  0.234665093
## Nisqually      0.120194585 -0.006680199
## Nooksack       0.049745872  0.080578518
## Olympic_Penninsula -0.226502487  0.100197900
## Puyallup       0.021948913 -0.083342967
## Salmon         0.158300579  0.024584125
## Skagit         -0.008402801 -0.025690623
## Skwawka        0.202702758  0.042716854
## Skykomish      0.065911813  0.188586871
## Squamish      -0.024357377  0.128530361
## Tahoe          -0.486879254  0.196409095
## Vancouver I. East -0.055871554 -0.382534234
## Willamette     -0.135328629  0.131179046
##
## $points
##           [,1]      [,2]
## Chilliwack  0.049295097 -0.093152172
## Columbia   -0.019881824  0.025923304
## Dean        -0.088925258 -0.351405852
## Harrison    0.049971696  0.031500726
## Homathko    0.096105641 -0.164738675
## Kitimat     -0.027412282  0.034848934
## Klinaklini  0.235166719  0.199370734
## Nisqually   0.082664248  0.019075261
## Nooksack    0.015594768  0.027886498
## Olympic_Penninsula -0.137557025  0.266273722
## Puyallup    0.001703421 -0.021547641
## Salmon     0.147974559 -0.118956841
## Skagit      -0.015434898  0.055339193
## Skwawka     0.192461714 -0.065737715
## Skykomish   0.040819584  0.157580043
## Squamish   -0.026451336  0.149137275
## Tahoe      -0.475620376 -0.009516745
## Vancouver I. East -0.035554222 -0.225138541
## Willamette  -0.084920226  0.083258493
##
## attr(,"class")
## [1] "ordiplot"
text(plot6, what="points", col="red", cex=0.6)

```

# Procrustes errors

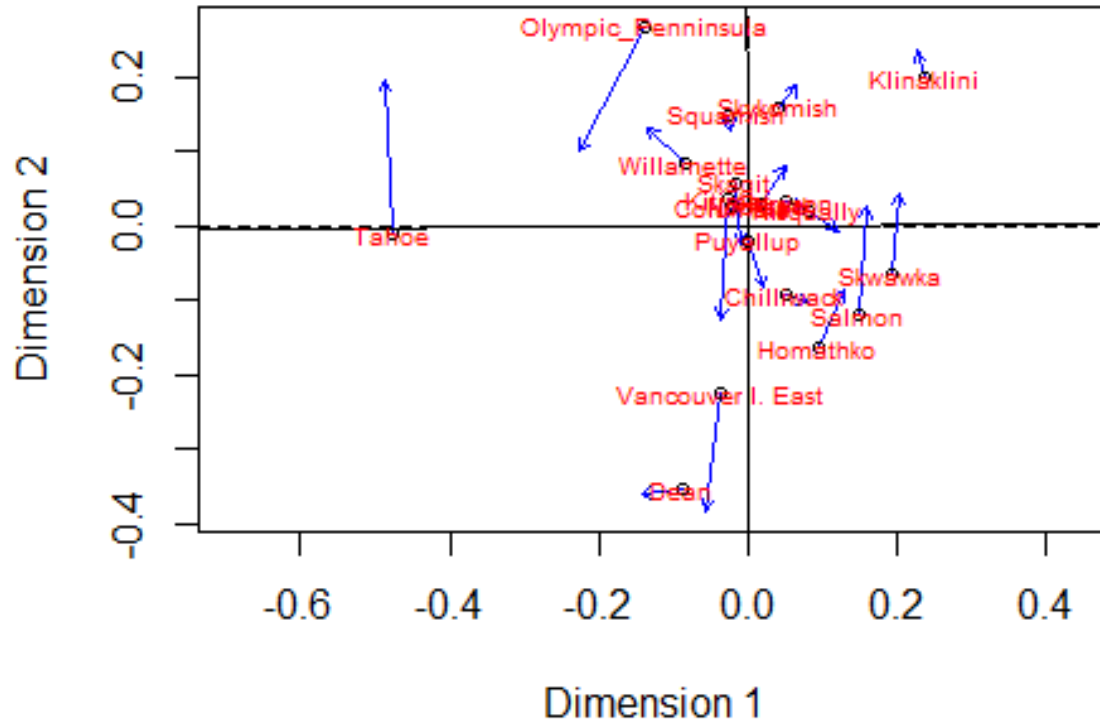

Supplement: Supplement_1_Euclidean-distances-among-populations-and-individuals.pdf [file Supplement_1_Euclidean-distances-among-populations-and-individuals.pdf]
