# Supplementary material for: AlleleShift: an R package to predict and visualize population-level changes in allele frequencies in response to climate change
Source: PeerJ journal article supplement (doi:10.7717/peerj.11534), 2021-06-15
Supplement: Article_S2._Simulation_Study.pdf [file Article_S2._Simulation_Study.pdf]

# AlleleShift simulation study

Roeland Kindt

22/03/2021

## Contents

|                                                                        |           |
|------------------------------------------------------------------------|-----------|
| <b>1 Packages needed</b>                                               | <b>1</b>  |
| <b>2 Obtain simulated data from LEA</b>                                | <b>1</b>  |
| <b>3 Select alleles that are most clearly associated with gradient</b> | <b>7</b>  |
| <b>4 Create new simulated data sets</b>                                | <b>9</b>  |
| 4.1 Baseline populations . . . . .                                     | 9         |
| 4.2 Future populations . . . . .                                       | 12        |
| <b>5 Calibrate the model</b>                                           | <b>15</b> |
| <b>6 Predict future frequencies</b>                                    | <b>26</b> |
| 6.1 Compare predicted and simulated future frequencies . . . . .       | 26        |
| 6.2 Plot predicted shifts in allele frequencies . . . . .              | 31        |
| <b>7 Discussion</b>                                                    | <b>33</b> |

## 1 Packages needed

```
library(AlleleShift) # also loads BiodiversityR and vegan
library(poppr) # also loads adegenet
library(LEA)
```

## 2 Obtain simulated data from LEA

Data sets **tutorial.R** and **tutorial.C** in the **LEA** package are subsets of the 4500 neutral SNPs and 500 adaptive SNPs used in the simulation study in Frichot and Francois 2015. The last 50 SNPs of **tutorial.C** are correlated with the environmental variable available from **tutorial.C**. These SNPs are selected for further analysis here.

Data are provided for 50 individuals.

The environmental data is first transformed to a range of 0 to 100. Environmental centres along the gradient for baseline populations range between 5 and 75. The populations shift +25 along the range in the future conditions.

```
data(tutorial)
str(tutorial.R)
```

```
## num [1:50, 1:400] 1 1 2 0 0 2 0 2 1 0 ...
```

```
str(tutorial.C)
```

```
## num [1:50] -3.96 -5.12 3.35 -16.99 16.47 ...
```

```
AlleleData <- tutorial.R[, 351:400]
```

```
EnvData <- tutorial.C
```

```
summary(EnvData)
```

```
##      Min.   1st Qu.   Median     Mean   3rd Qu.     Max.
## -23.90071 -10.02858  0.50231  -0.09481 11.12218  31.58909
```

```
summary(EnvData)
```

```
##      Min.   1st Qu.   Median     Mean   3rd Qu.     Max.
## -23.90071 -10.02858  0.50231  -0.09481 11.12218  31.58909
```

```
EnvData <- 100 * (EnvData - min(EnvData)) / (max(EnvData) - min(EnvData))
```

```
summary(EnvData)
```

```
##      Min. 1st Qu.  Median     Mean 3rd Qu.     Max.
##      0.00  25.00  43.98  42.90  63.12  100.00
```

Individuals are sorted along the gradient so that the first individual has the lowest value and the last individual has the highest value.

```
gradient.order <- order(EnvData)
```

```
AlleleData <- AlleleData[gradient.order, ]
```

```
EnvData <- EnvData[gradient.order]
```

```
EnvData
```

```
## [1] 0.000000 6.413219 8.880776 9.755212 10.724297 10.866225
## [7] 12.460328 13.400826 14.887664 19.454217 19.821983 19.854725
## [13] 23.974253 28.074904 28.837442 28.901264 30.201894 33.848945
## [19] 35.230482 35.936053 36.401090 36.901425 38.431460 40.789897
## [25] 42.561067 45.393925 45.787849 46.479914 46.695269 47.098588
## [31] 49.103218 50.059571 50.435466 50.888918 54.511087 56.452843
## [37] 62.074801 63.462934 63.963338 64.063853 64.436875 67.775217
## [43] 68.267914 69.736615 72.558699 72.749981 77.435962 78.186955
## [49] 90.840963 100.000000
```

Plots show the counts for the 'A' alleles along the gradient separately for each locus. Whereas the frequency of the A alleles increases clearly along the gradient, there is considerable overlap between occurrences of both alleles over most of the range.

```
par(mfrow=c(2, 5))
```

```
for (i in 1:50) {
```

```
plot(AlleleData[, i] ~ EnvData, ann=FALSE)
```

```
}
```

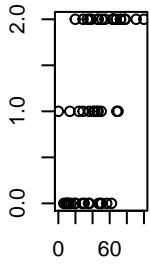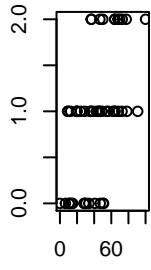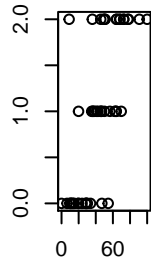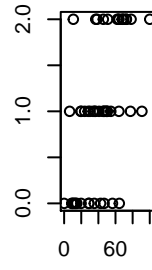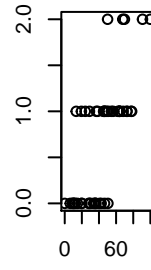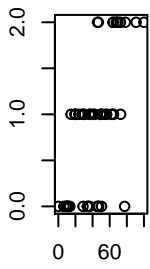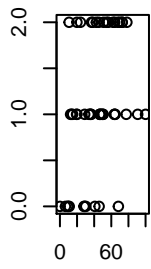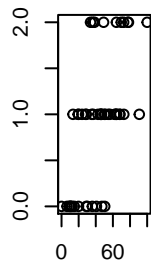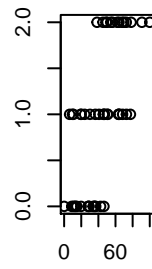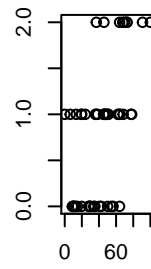

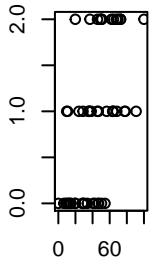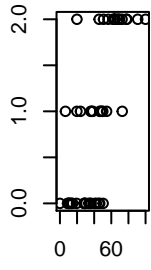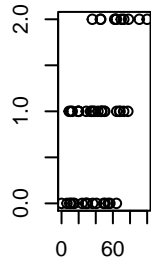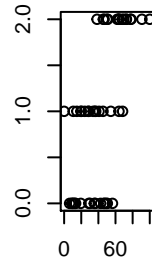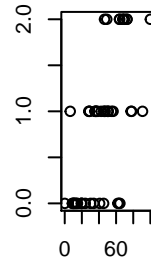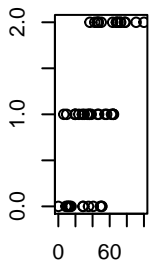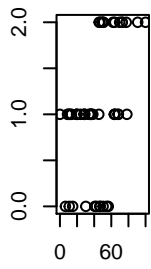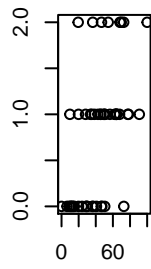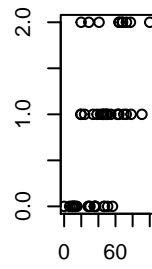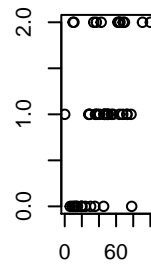

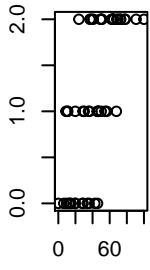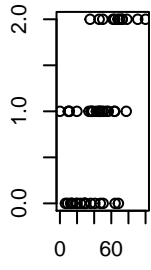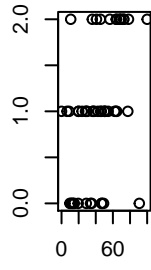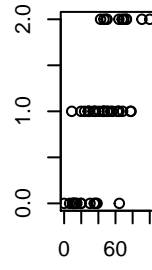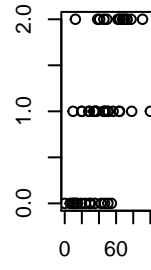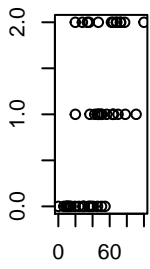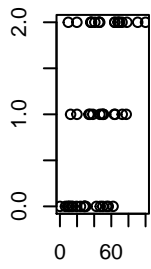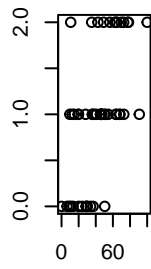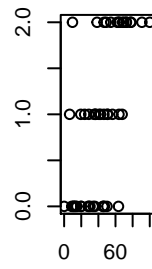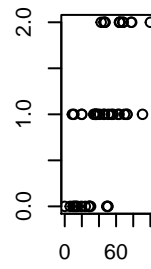



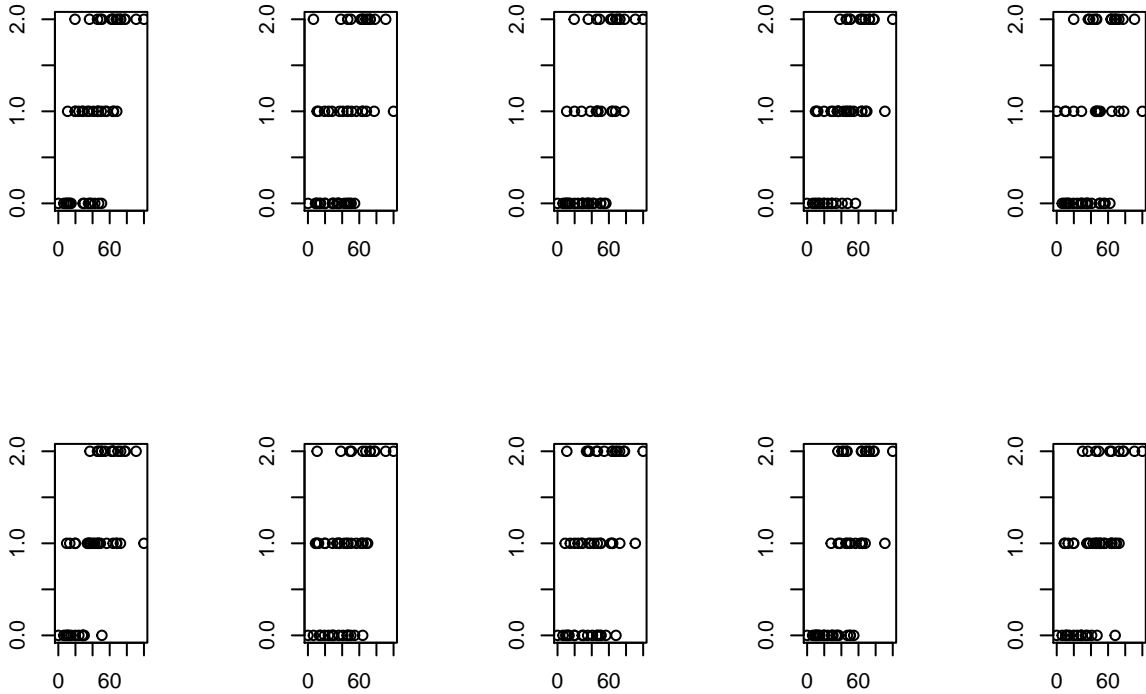

```
par(mfrow=c(1, 1))
```

### 3 Select alleles that are most clearly associated with gradient

Via a generalized linear model, the five loci with highest percentages of explained variance are selected.

```
locus.explained <- numeric(length=50)
```

```
for (i in 1:50) {
  # i <- 1
```

```
  data.i <- data.frame(cbind(A=AlleleData[, i], EnvData))
  data.i$B <- 2 - data.i$A
  data.mod.i <- glm(cbind(A, B) ~ EnvData,
                    data=data.i,
                    family=binomial(link=logit))
  locus.explained[i] <- data.mod.i$deviance / data.mod.i>null.deviance
}
```

```
locus.explained[order(locus.explained, decreasing=TRUE)]
```

```
## [1] 0.8898501 0.8476764 0.8445766 0.8349432 0.8218747 0.8192781 0.8137260
## [8] 0.8118696 0.8105033 0.7783817 0.7757875 0.7754227 0.7711550 0.7628589
## [15] 0.7602469 0.7556557 0.7436847 0.7432226 0.7396958 0.7355309 0.7335119
## [22] 0.7316037 0.7282626 0.7275067 0.7234654 0.7209665 0.7059418 0.7022914
## [29] 0.6775506 0.6751224 0.6710200 0.6705066 0.6692063 0.6625471 0.6622549
```

```
## [36] 0.6617779 0.6606001 0.6590038 0.6548352 0.6302401 0.6262960 0.6237194
## [43] 0.6203140 0.5799551 0.5762885 0.5670727 0.5640100 0.5616780 0.5353558
## [50] 0.5134911
```

A subset is created with the 5 loci with the clearest trends in frequency changes along the gradient.

```
AlleleData <- AlleleData[, order(locus.explained, decreasing=TRUE)[1:5]]
```

Plots of the ranges shows that considerable overlap remains among the two alleles. For several loci, there are cases where at the lowest section of the range, both alleles are observed, not only the B allele.

```
par(mfrow=c(1, 3))

for (i in 1:5) {

plot(AlleleData[, i] ~ EnvData, ann=FALSE)

}
```

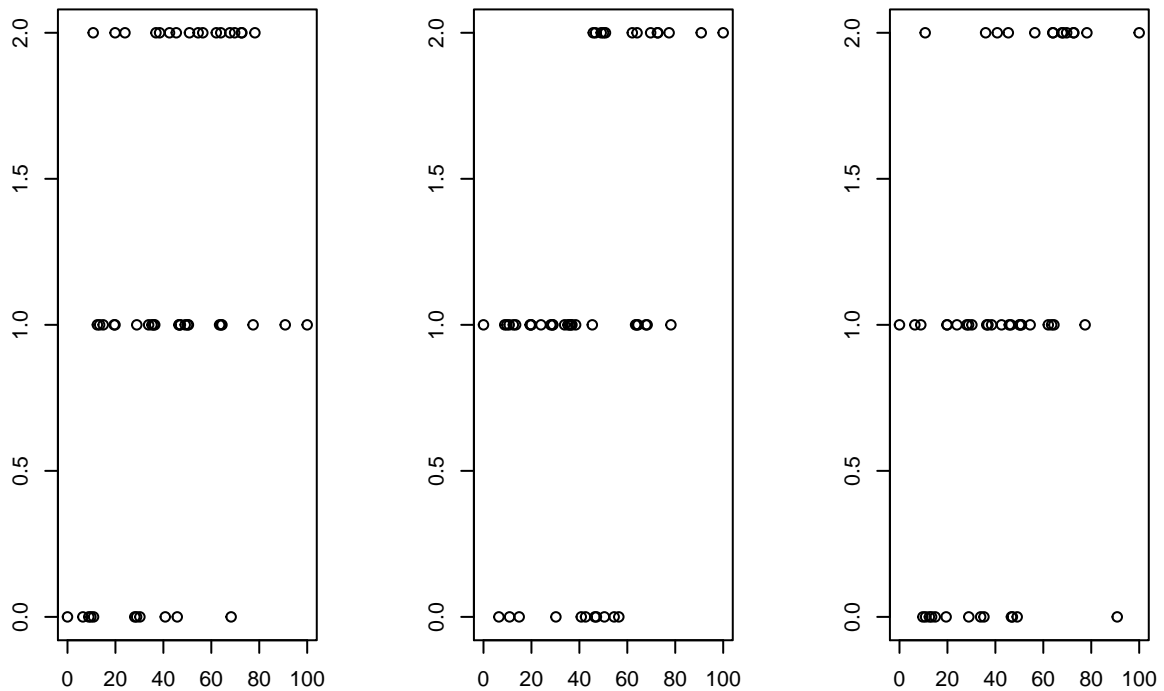

```
par(mfrow=c(1, 1))
```



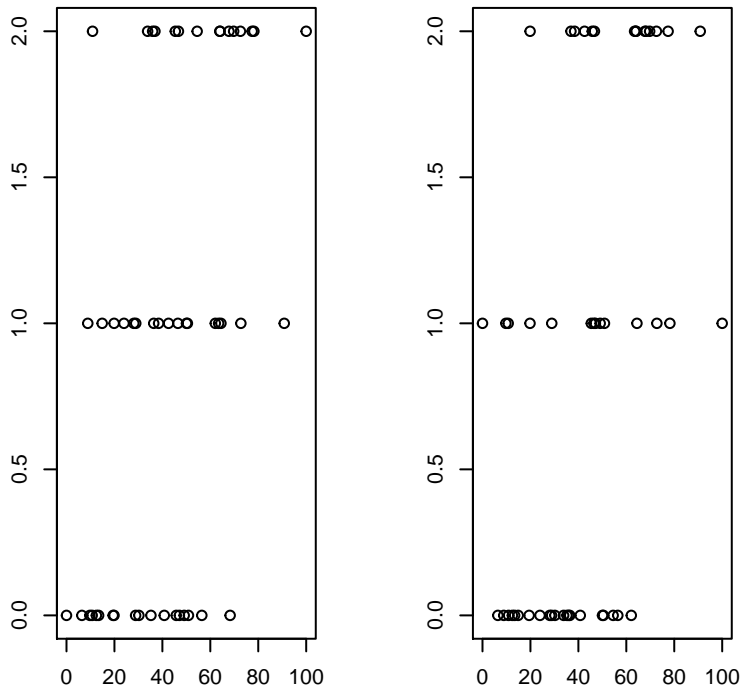

## 4 Create new simulated data sets

For the simulation study here, 8 populations are simulated. In the baseline climate, populations have a centred value on the environmental gradient that ranges between 5 to 75 with a distance of 10 between populations. In the future climate, populations have centred values that range between 30 and 100 with the same distance of 10.

```
baseline.means <- seq(from=5, to=75, by=10)
baseline.means
```

```
## [1] 5 15 25 35 45 55 65 75
```

```
future.means <- baseline.means + 25
future.means
```

```
## [1] 30 40 50 60 70 80 90 100
```

A resampling procedure randomly selects 1000 individuals for each population. These individuals are selected from a subset of the allele data set that are within a range of 20 around the centres of the baseline and future populations.

```
pop.mat <- data.frame(array(0, dim=c(1000, 10)))
names(pop.mat) <- paste0("L", rep(c(1:5), each=2), c(".A", ".B"))
```

### 4.1 Baseline populations

```

baseline.actuals <- baseline.means

for (p in c(1:8)) {

  interval.L <- baseline.means[p] - 10
  interval.U <- baseline.means[p] + 10
  candidates.B <- AlleleData[EnvData >= interval.L, , drop=FALSE]
  EnvData1 <- EnvData[EnvData >= interval.L]
  candidates.B <- candidates.B[EnvData1 <= interval.U, , drop=FALSE]

  EnvData2 <- EnvData1[EnvData1 <= interval.U]
  baseline.actuals[p] <- mean(EnvData2)

  pop.data <- pop.mat

  set.seed(1)
  for (i in c(1:1000)) {
    cand <- candidates.B[sample(1:nrow(candidates.B), 1), ]
    for (l in 1:5) {
      if (cand[l] == 0) {
        pop.data[i, ((l-1)*2 + 1)] <- 0
        pop.data[i, ((l-1)*2 + 2)] <- 2
      }
      if (cand[l] == 1) {
        pop.data[i, ((l-1)*2 + 1)] <- 1
        pop.data[i, ((l-1)*2 + 2)] <- 1
      }
      if (cand[l] == 2) {
        pop.data[i, ((l-1)*2 + 1)] <- 2
        pop.data[i, ((l-1)*2 + 2)] <- 0
      }
    }
  }

  if (p == 1) {
    baseline.ind <- pop.data
  }else{
    baseline.ind <- rbind(baseline.ind, pop.data)
  }
}

# convert to genind object

baseline.genind <- genind(baseline.ind)
baseline.genind@pop <- factor(rep(paste0("P", c(1:8)), each=1000),
                             levels=c(paste0("P", c(1:8))))
poppr::poppr(baseline.genind)

```

```

##      Pop      N MLG eMLG      SE      H      G lambda      E.5 Hexp      Ia rbarD
## 1    P1 1000   8     8 0.00000 2.03   7.22   0.861 0.936 0.379 0.543 0.1402
## 2    P2 1000  10    10 0.00000 2.19   7.61   0.869 0.836 0.411 0.494 0.1257
## 3    P3 1000   9     9 0.00000 2.19   8.92   0.888 0.995 0.445 0.233 0.0616
## 4    P4 1000  12    12 0.00000 2.48  11.86   0.916 0.994 0.480 0.582 0.1530

```

```
## 5 P5 1000 17 17 0.00000 2.83 16.92 0.941 0.997 0.492 0.314 0.0790
## 6 P6 1000 16 16 0.00000 2.77 15.83 0.937 0.994 0.488 0.362 0.0919
## 7 P7 1000 9 9 0.00000 2.12 7.66 0.869 0.908 0.367 0.671 0.1731
## 8 P8 1000 6 6 0.00000 1.75 5.53 0.819 0.948 0.280 0.570 0.1549
## 9 Total 8000 39 39 0.00125 3.52 28.49 0.965 0.834 0.496 0.446 0.1123
## File
## 1 baseline.genind
## 2 baseline.genind
## 3 baseline.genind
## 4 baseline.genind
## 5 baseline.genind
## 6 baseline.genind
## 7 baseline.genind
## 8 baseline.genind
## 9 baseline.genind
```

```
# convert to genpop object
```

```
baseline.genpop <- adegenet::genind2genpop(baseline.genind)
```

```
##
## Converting data from a genind to a genpop object...
##
## ...done.
```

```
# compare centre and mean of population ranges
```

```
rbind(baseline.means, baseline.actuals)
```

```
##           [,1]      [,2]      [,3]      [,4]      [,5]      [,6]      [,7]
## baseline.means 5.000000 15.000000 25.000000 35.000000 45.000000 55.000000 65.000000
## baseline.actuals 9.709839 14.20781 25.88551 34.67633 44.27678 53.80678 65.95846
##           [,8]
## baseline.means 75.00000
## baseline.actuals 72.38733
```

Plots of the frequency of the A allele along the environmental gradient show that generally the frequency increases along the gradient. However, the increase is not monotonous for four out of five of the loci. For example, for the second locus, the frequency of the A allele is lower for the fourth population than the third populations.

As a consequence of the overlap in occurrence of A and B alleles along the gradient, frequencies lower than 0.15 are not observed.

```
freq.plot <- adegenet::makefreq(baseline.genpop)
```

```
##
## Finding allelic frequencies from a genpop object...
##
## ...done.
```

```
par(mfrow=c(1, 5))
```

```
for (l in 1:5) {
  plot(freq.plot[, (l-1)*2 + 1], ylim=c(0, 1),
       type="b", col="red", ann=FALSE)
}
```

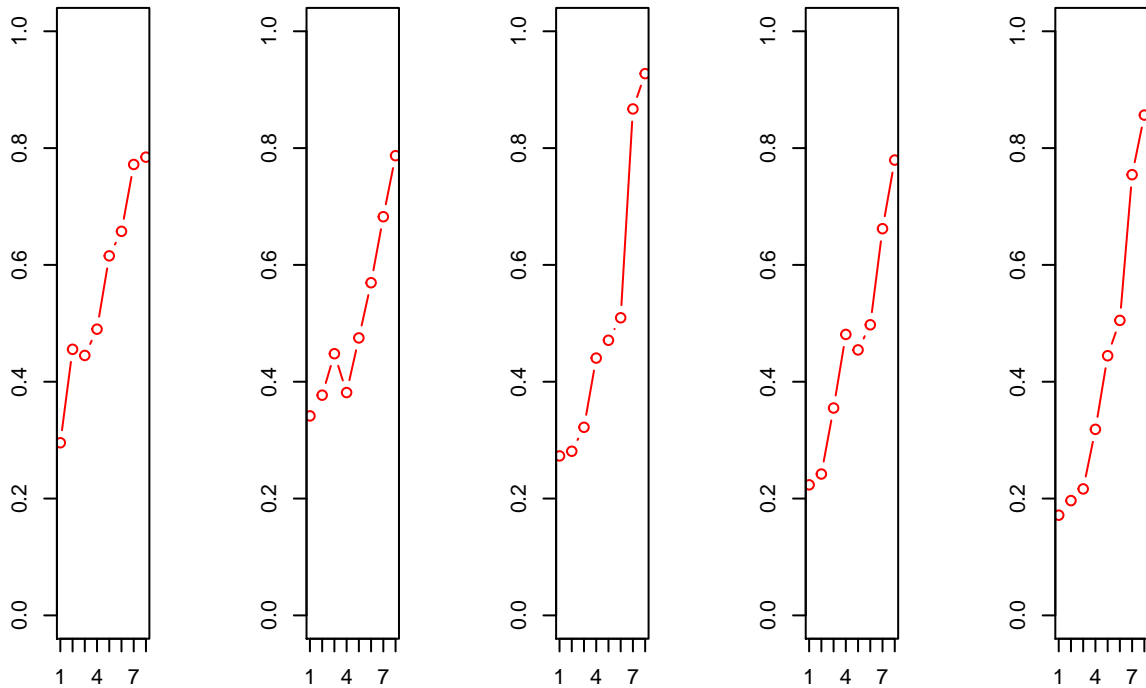

```
par(mfrow=c(1, 1))
```

## 4.2 Future populations

The same procedure is used to select individuals for future populations.

```
future.actuals <- future.means
```

```
for (p in c(1:8)) {
```

```
  interval.L <- future.means[p] - 10
  interval.U <- future.means[p] + 10
  candidates.B <- AlleleData[EnvData >= interval.L, , drop=FALSE]
  EnvData1 <- EnvData[EnvData >= interval.L]
  candidates.B <- candidates.B[EnvData1 <= interval.U, , drop=FALSE]
```

```
  EnvData2 <- EnvData1[EnvData1 <= interval.U]
  future.actuals[p] <- mean(EnvData2)
```

```
  pop.data <- pop.mat
```

```
  set.seed(1)
```

```
  for (i in c(1:1000)) {
    cand <- candidates.B[sample(1:nrow(candidates.B), 1), ]
    for (l in 1:5) {
      if (cand[l] == 0) {
        pop.data[i, ((l-1)*2 + 1)] <- 0
      }
    }
  }
}
```

```

    pop.data[i, ((1-1)*2 + 2)] <- 2
  }
  if (cand[l] == 1) {
    pop.data[i, ((1-1)*2 + 1)] <- 1
    pop.data[i, ((1-1)*2 + 2)] <- 1
  }
  if (cand[l] == 2) {
    pop.data[i, ((1-1)*2 + 1)] <- 2
    pop.data[i, ((1-1)*2 + 2)] <- 0
  }
}
}

if (p == 1) {
  future.ind <- pop.data
}else{
  future.ind <- rbind(future.ind, pop.data)
}

}

# convert to genind object

future.genind <- genind(future.ind)
future.genind@pop <- factor(rep(paste0("P", c(1:8)), each=1000),
                           levels=c(paste0("P", c(1:8))))
poppr::poppr(future.genind)

##      Pop      N MLG eMLG      SE      H      G lambda  E.5  Hexp   Ia  rbarD
## 1    P1 1000  11   11 0.00000 2.393 10.89  0.908 0.995 0.464 0.327 0.0876
## 2    P2 1000  15   15 0.00000 2.702 14.83  0.933 0.994 0.495 0.489 0.1233
## 3    P3 1000  13   13 0.00000 2.559 12.84  0.922 0.994 0.486 0.370 0.0947
## 4    P4 1000  12   12 0.00000 2.471 11.64  0.914 0.982 0.455 0.479 0.1239
## 5    P5 1000  10   10 0.00000 2.240  8.77  0.886 0.926 0.343 0.512 0.1309
## 6    P6 1000   4    4 0.00000 1.384  3.98  0.749 0.997 0.243 0.624 0.1561
## 7    P7 1000   2    2 0.00000 0.693  2.00  0.500 1.000 0.350 1.667 1.0000
## 8    P8 1000   2    2 0.00000 0.693  2.00  0.500 1.000 0.350 1.667 1.0000
## 9 Total 8000 35   35 0.00654 3.271 18.75  0.947 0.701 0.466 0.420 0.1056
##           File
## 1 future.genind
## 2 future.genind
## 3 future.genind
## 4 future.genind
## 5 future.genind
## 6 future.genind
## 7 future.genind
## 8 future.genind
## 9 future.genind

# convert to genpop object
future.genpop <- adegenet::genind2genpop(future.genind)

##
## Converting data from a genind to a genpop object...

```

```
##
## ...done.
# compare centre and mean of population ranges
rbind(future.means, future.actuals)

##           [,1]    [,2]    [,3]    [,4]    [,5]    [,6]    [,7]
## future.means 30.00000 40.00000 50.00000 60.00000 70.00000 80.00000 90.00000
## future.actuals 32.43084 40.72407 48.17366 60.47149 68.7261 75.2329 95.42048
##           [,8]
## future.means 100.00000
## future.actuals 95.42048
```

Graphs of future populations also show a general increase in the frequencies of the A allele. However, as a result from high frequencies of heterozygous individuals at the highest values of the environmental gradient for some loci, there is a significant drop in frequencies for the eight or seventh and eighth population for loci 1 and 3.

```
freq.plot <- adegenet::makefreq(future.genpop)

##
## Finding allelic frequencies from a genpop object...
##
## ...done.
par(mfrow=c(1, 5))

for (l in 1:5) {
  plot(freq.plot[, (l-1)*2 + 1], ylim=c(0, 1),
        type="b", col="red", ann=FALSE)
}
```

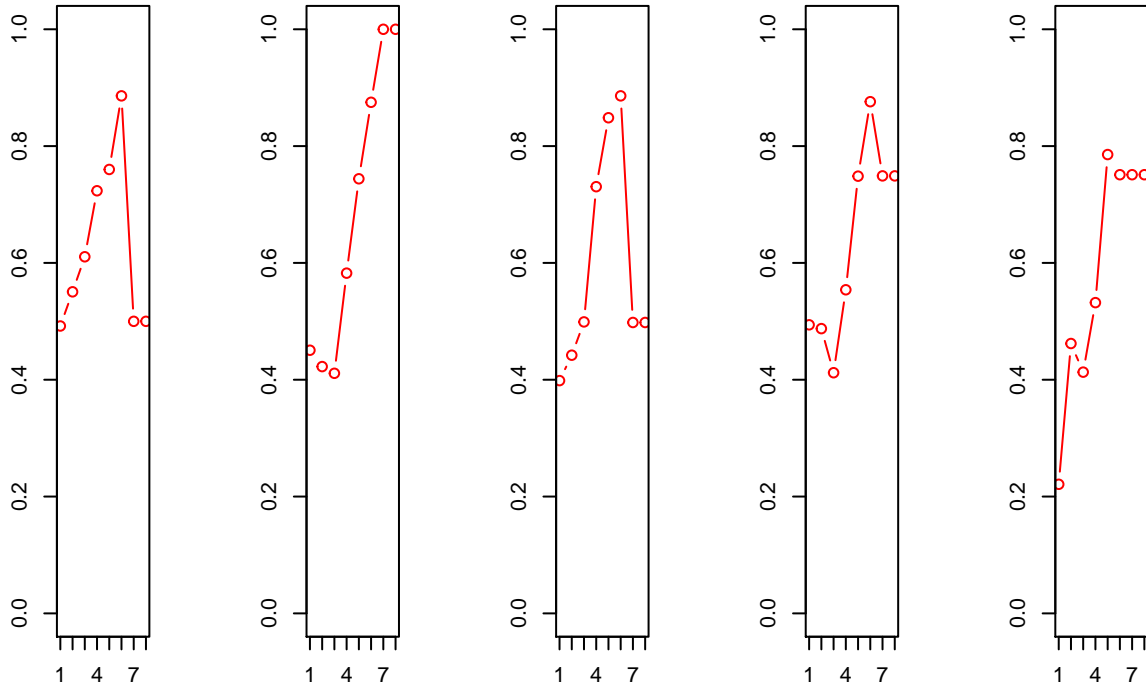

```
par(mfrow=c(1, 1))
```

Checking for novel conditions with a newer function in the package shows that novel conditions are encountered for populations 6, 7 and 8.

```
env.baseline <- data.frame(gradient=baseline.actuals)
env.future <- data.frame(gradient=future.actuals)
```

```
environmental.novel(env.baseline, env.future)
```

| ##   | Pop | Var      | Min      | Mean     | Max      | SD       | Future.val | Novel | Novel.stat  |
|------|-----|----------|----------|----------|----------|----------|------------|-------|-------------|
| ## 1 | 1   | <NA>     | NA       | NA       | NA       | NA       | NA         | FALSE | Inf         |
| ## 2 | 2   | <NA>     | NA       | NA       | NA       | NA       | NA         | FALSE | Inf         |
| ## 3 | 3   | <NA>     | NA       | NA       | NA       | NA       | NA         | FALSE | Inf         |
| ## 4 | 4   | <NA>     | NA       | NA       | NA       | NA       | NA         | FALSE | Inf         |
| ## 5 | 5   | <NA>     | NA       | NA       | NA       | NA       | NA         | FALSE | Inf         |
| ## 6 | 6   | gradient | 9.709839 | 40.11361 | 72.38733 | 23.12045 | 75.23290   | TRUE  | 0.064384908 |
| ## 7 | 7   | gradient | 9.709839 | 40.11361 | 72.38733 | 23.12045 | 95.42048   | TRUE  | 0.008375701 |
| ## 8 | 8   | gradient | 9.709839 | 40.11361 | 72.38733 | 23.12045 | 95.42048   | TRUE  | 0.008375701 |

## 5 Calibrate the model

The main calibration and prediction functions from AlleleShift are used to predict baseline allele frequencies.

```
sim.count.model <- count.model(baseline.genpop,
                               env.data=env.baseline)
```

```

##
## Finding allelic frequencies from a genpop object...
##
## ...done.
##
##
## Call:
## rda(formula = gen.comm.b ~ gradient, data = env.data)
##
## Partitioning of variance:
##           Inertia Proportion
## Total           1792015    1.00000
## Constrained     1648160    0.91972
## Unconstrained   143855     0.08028
##
## Eigenvalues, and their contribution to the variance
##
## Importance of components:
##           RDA1          PC1          PC2          PC3          PC4
## Eigenvalue      1.648e+06 1.019e+05 2.259e+04 1.129e+04 6.135e+03
## Proportion Explained 9.197e-01 5.689e-02 1.261e-02 6.299e-03 3.424e-03
## Cumulative Proportion 9.197e-01 9.766e-01 9.892e-01 9.955e-01 9.989e-01
##           PC5
## Eigenvalue      1.899e+03
## Proportion Explained 1.060e-03
## Cumulative Proportion 1.000e+00
##
## Accumulated constrained eigenvalues
## Importance of components:
##           RDA1
## Eigenvalue      1648160
## Proportion Explained 1
## Cumulative Proportion 1
##
## Scaling 2 for species and site scores
## * Species are scaled proportional to eigenvalues
## * Sites are unscaled: weighted dispersion equal on all dimensions
## * General scaling constant of scores: 59.51274
##
##
## Species scores
##
##           RDA1          PC1          PC2          PC3          PC4          PC5
## L1.A -14.86  0.1611  2.5559  1.9579  1.47818  0.07634
## L1.B  14.86 -0.1611 -2.5559 -1.9579 -1.47818 -0.07634
## L2.A -13.30  3.4332  2.2391 -2.5037  0.74482 -0.09642
## L2.B  13.30 -3.4332 -2.2391  2.5037 -0.74482  0.09642
## L3.A -21.27  7.4650 -0.9318  0.8509 -0.09046 -0.80071
## L3.B  21.27 -7.4650  0.9318 -0.8509  0.09046  0.80071
## L4.A -16.61  2.3158 -2.9570 -0.2913  1.48487  0.58739
## L4.B  16.61 -2.3158  2.9570  0.2913 -1.48487 -0.58739
## L5.A -22.41  5.2760  1.0813  0.4934 -1.05359  0.93552
## L5.B  22.41 -5.2760 -1.0813 -0.4934  1.05359 -0.93552
##

```



```

##
## Site scores (weighted sums of species scores)
##
##      RDA1    PC1    PC2    PC3    PC4    PC5
## P1 25.9109 20.88 -6.643 -13.50 -39.452  2.235
## P2 21.1361 12.68 29.442  21.31  25.037  9.708
## P3 16.2412 -10.16 -1.873 -32.61  26.418 -24.735
## P4  8.0333 -11.37 -47.129  18.14  11.002  3.499
## P5  0.4916 -21.81  7.387  20.56 -10.292 19.714
## P6 -5.3667 -34.68 17.636 -14.85 -15.137  0.899
## P7 -28.8633 17.40  5.057  21.32  -8.825 -40.047
## P8 -37.5831 27.05 -3.876 -20.36  11.248 28.728
##
##
## Site constraints (linear combinations of constraining variables)
##
##      RDA1    PC1    PC2    PC3    PC4    PC5
## P1 29.58 20.88 -6.643 -13.50 -39.452  2.235
## P2 25.20 12.68 29.442  21.31  25.037  9.708
## P3 13.84 -10.16 -1.873 -32.61  26.418 -24.735
## P4  5.29 -11.37 -47.129  18.14  11.002  3.499
## P5 -4.05 -21.81  7.387  20.56 -10.292 19.714
## P6 -13.32 -34.68 17.636 -14.85 -15.137  0.899
## P7 -25.14 17.40  5.057  21.32  -8.825 -40.047
## P8 -31.40 27.05 -3.876 -20.36  11.248 28.728
##
##
## Biplot scores for constraining variables
##
##      RDA1 PC1 PC2 PC3 PC4 PC5
## gradient -1  0  0  0  0  0
##
## Permutation test for rda under reduced model
## Permutation: free
## Number of permutations: 99
##
## Model: rda(formula = gen.comm.b ~ gradient, data = env.data)
##      Df Variance      F Pr(>F)
## Model  1 1648160 68.742  0.01 **
## Residual 6  143855
## ---
## Signif. codes:  0 '***' 0.001 '**' 0.01 '*' 0.05 '.' 0.1 ' ' 1
## Permutation test for rda under reduced model
## Terms added sequentially (first to last)
## Permutation: free
## Number of permutations: 99
##
## Model: rda(formula = gen.comm.b ~ gradient, data = env.data)
##      Df Variance      F Pr(>F)
## gradient 1 1648160 68.742  0.01 **
## Residual 6  143855
## ---
## Signif. codes:  0 '***' 0.001 '**' 0.01 '*' 0.05 '.' 0.1 ' ' 1
## Permutation test for rda under NA model

```

```
## Marginal effects of terms
## Permutation: free
## Number of permutations: 99
##
## Model: rda(formula = gen.comm.b ~ gradient, data = env.data)
##           Df Variance      F Pr(>F)
## gradient  1 1648160 68.742  0.01 **
## Residual  6   143855
## ---
## Signif. codes:  0 '***' 0.001 '**' 0.01 '*' 0.05 '.' 0.1 ' ' 1
```

```
sim.pred.baseline <- count.pred(sim.count.model,
                                env.data=env.baseline)
```

```
sim.freq.model <- freq.model(sim.pred.baseline)
```

```
##
## Family: binomial
## Link function: logit
##
## Formula:
## cbind(A, B) ~ s(Freq.e1)
##
## Parametric coefficients:
##           Estimate Std. Error z value Pr(>|z|)
## (Intercept) 0.009538  0.007938  1.202   0.229
##
## Approximate significance of smooth terms:
##           edf Ref.df Chi.sq p-value
## s(Freq.e1) 8.664  8.967 10769 <2e-16 ***
## ---
## Signif. codes:  0 '***' 0.001 '**' 0.01 '*' 0.05 '.' 0.1 ' ' 1
##
## R-sq.(adj) = 0.951  Deviance explained = 95.7%
## UBRE = 14.608  Scale est. = 1          n = 40
```

```
sim.freq.baseline <- freq.pred(sim.freq.model,
                               count.predicted=sim.pred.baseline)
```

Comparisons of input frequencies with predicted frequencies show that in most cases differences between predicted and input frequencies are smaller than 0.05. Predictions are generally worse for the fourth population and the first allele, although absolute differences are typically not larger than 0.08.

```
plot.freqs <- sim.freq.baseline[, c("Pop.index", "Allele",
                                   "Allele.freq", "Freq.e1", "Freq.e2")]
```

```
plot.freqs$freq.diff <- abs(plot.freqs$Allele.freq - plot.freqs$Freq.e2)
plot.freqs[order(plot.freqs$Allele.freq), ]
```

```
##   Pop.index Allele Allele.freq  Freq.e1  Freq.e2  freq.diff
## 14         1   L5.A    0.1715 0.1014997 0.1648966 6.603438e-03
## 24         2   L5.A    0.1965 0.1505331 0.2165325 2.003246e-02
## 34         3   L5.A    0.2165 0.2778341 0.2601839 4.368394e-02
## 13         1   L4.A    0.2235 0.2161639 0.2471556 2.365559e-02
## 23         2   L4.A    0.2420 0.2525147 0.2497567 7.756732e-03
## 12         1   L3.A    0.2730 0.1968069 0.2442019 2.879813e-02
```

```

## 22      2  L3.A      0.2810 0.2433537 0.2483680 3.263198e-02
## 1       1  L1.A      0.2955 0.3445967 0.3432206 4.772061e-02
## 44      4  L5.A      0.3185 0.3736646 0.3881340 6.963396e-02
## 32      3  L3.A      0.3220 0.3641994 0.3744802 5.248017e-02
## 11      1  L2.A      0.3415 0.3109854 0.2924763 4.902372e-02
## 33      3  L4.A      0.3550 0.3468893 0.3469618 8.038175e-03
## 21      2  L2.A      0.3770 0.3400950 0.3358926 4.110744e-02
## 41      4  L2.A      0.3815 0.4725615 0.4425719 6.107185e-02
## 42      4  L3.A      0.4405 0.4551703 0.4395946 9.053680e-04
## 54      5  L5.A      0.4445 0.4783211 0.4439190 5.809526e-04
## 3       3  L1.A      0.4450 0.4615583 0.4405745 4.425454e-03
## 31      3  L2.A      0.4480 0.4156698 0.4283111 1.968888e-02
## 53      5  L4.A      0.4545 0.4955201 0.4497379 4.762112e-03
## 2       2  L1.A      0.4555 0.3771202 0.3927369 6.276314e-02
## 52      5  L3.A      0.4710 0.5545197 0.4939215 2.292149e-02
## 51      5  L2.A      0.4750 0.5346929 0.4749789 2.110606e-05
## 43      4  L4.A      0.4810 0.4179331 0.4295019 5.149808e-02
## 4       4  L1.A      0.4900 0.5251221 0.4672411 2.275889e-02
## 63      6  L4.A      0.4975 0.5725377 0.5139233 1.642330e-02
## 64      6  L5.A      0.5050 0.5822096 0.5255244 2.052444e-02
## 62      6  L3.A      0.5095 0.6531400 0.6278525 1.183525e-01
## 61      6  L2.A      0.5695 0.5963683 0.5434386 2.606145e-02
## 5       5  L1.A      0.6155 0.5945402 0.5410653 7.443475e-02
## 6       6  L1.A      0.6575 0.6634488 0.6457116 1.178843e-02
## 73      7  L4.A      0.6620 0.6707428 0.6587942 3.205812e-03
## 71      7  L2.A      0.6825 0.6750106 0.6665957 1.590432e-02
## 74      7  L5.A      0.7545 0.7146776 0.7404661 1.403391e-02
## 7       7  L1.A      0.7720 0.7513141 0.8019730 2.997297e-02
## 83      8  L4.A      0.7795 0.7226984 0.7548489 2.465109e-02
## 8       8  L1.A      0.7845 0.7977994 0.8606631 7.616308e-02
## 81      8  L2.A      0.7870 0.7166164 0.7439786 4.302136e-02
## 84      8  L5.A      0.8565 0.7847601 0.8464747 1.002526e-02
## 72      7  L3.A      0.8670 0.7788906 0.8395316 2.746837e-02
## 82      8  L3.A      0.9275 0.8454192 0.9013085 2.619151e-02

```

```

boxplot(freq.diff ~ Pop.index, data=plot.freqs)
abline(h=0.08, col="red")
abline(h=0.05, col="red")
abline(h=0.01, col="red")

```

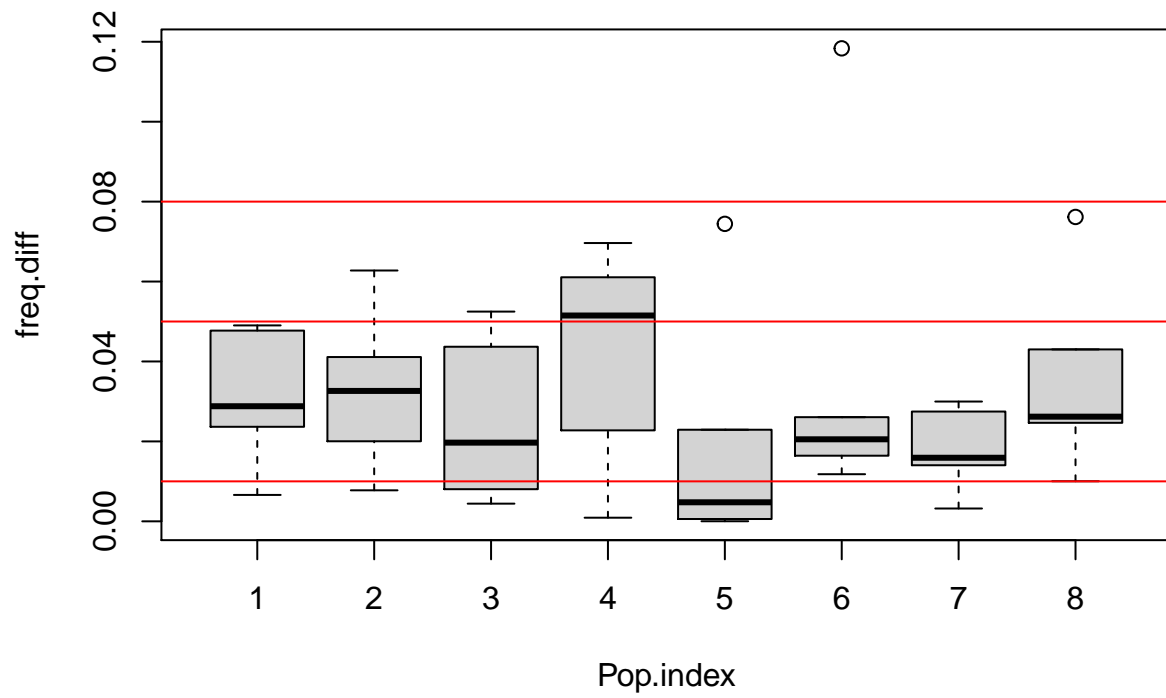

```
boxplot(freq.diff ~ Allele, data=plot.freqs)
abline(h=0.08, col="red")
abline(h=0.05, col="red")
abline(h=0.01, col="red")
```

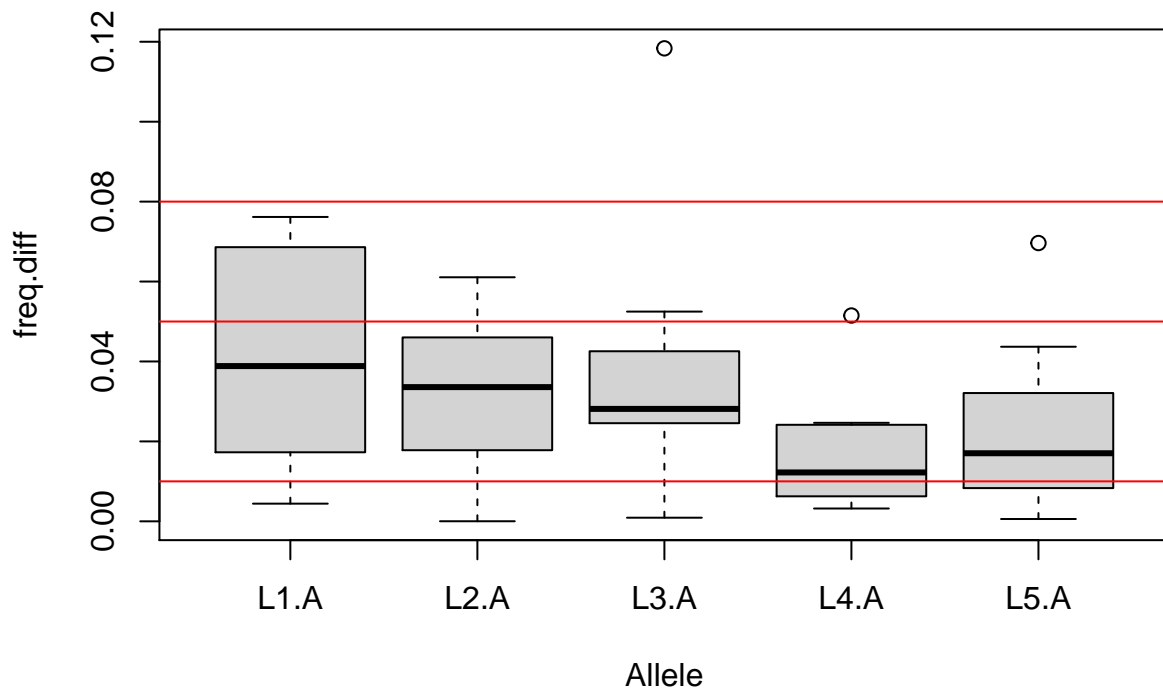

Where there is more variation in predictions between the RDA (step 1) and GAM model (step 2) between populations, there is less variation among these predictions between alleles.

```
plot.freqs$freq.diff.e <- abs(plot.freqs$Freq.e1 - plot.freqs$Freq.e2)
```

```
boxplot(freq.diff.e ~ Pop.index, data=plot.freqs)
abline(h=0.08, col="red")
abline(h=0.05, col="red")
abline(h=0.01, col="red")
```

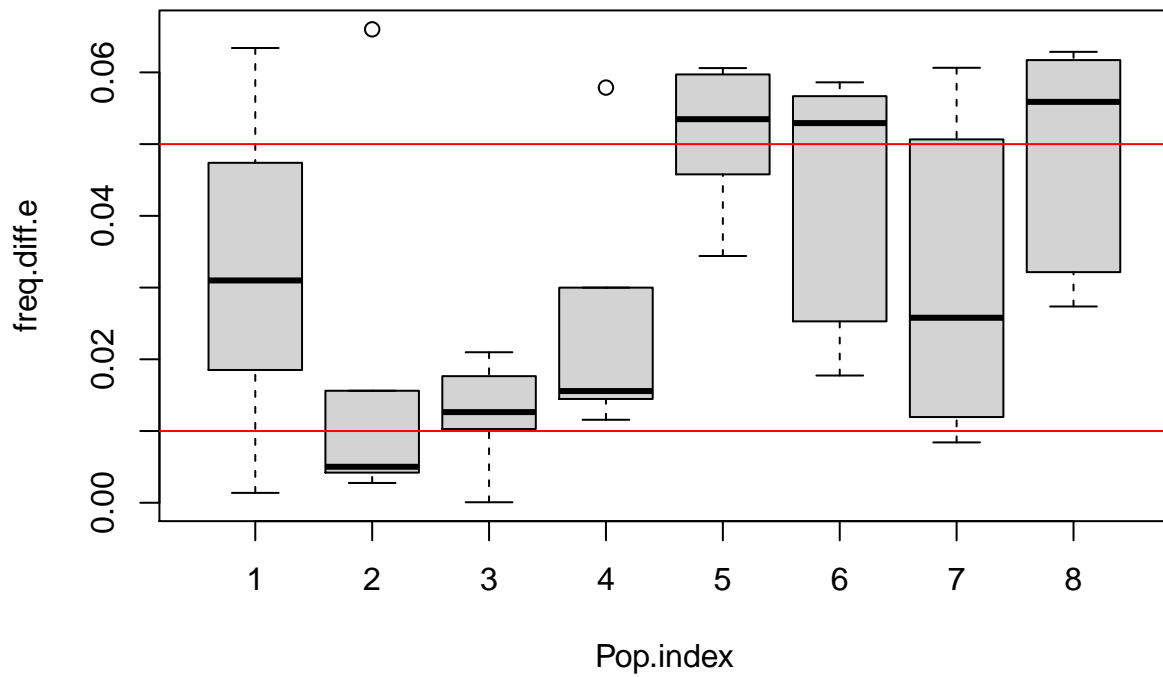

```
boxplot(freq.diff.e ~ Allele, data=plot.freqs)
abline(h=0.08, col="red")
abline(h=0.05, col="red")
abline(h=0.01, col="red")
```

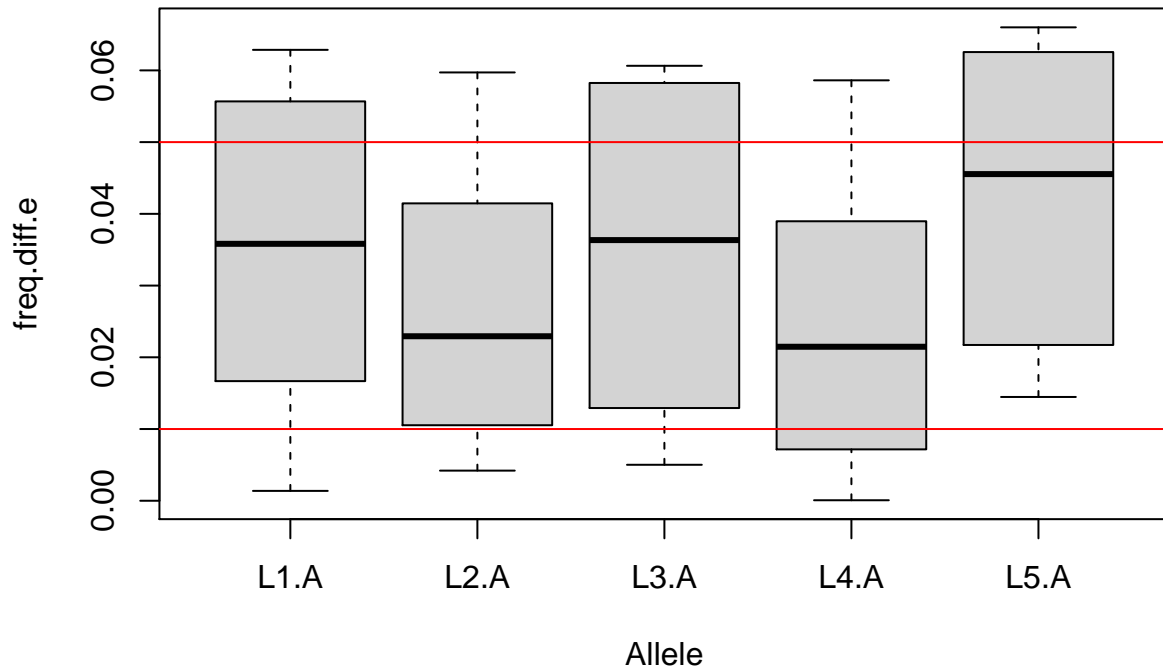

Plots of the best predictions, using a threshold of 0.50, confirm the good agreement between input and predicted frequencies.

```
plotA1 <- freq.ggplot(sim.freq.baseline,
  colour.Pop=TRUE,
  plot.best=TRUE,
  threshold=0.50,
  xlim=c(-0.05, 1.0),
  ylim=c(0.0, 1.0))
```

```
## Populations ordered by R2
```

```
##   Pop Pop.label   N GAM.rsq
## 2  P2         2 1000  0.98
## 3  P3         3 1000  0.93
## 7  P7         7 1000  0.93
## 5  P5         5 1000  0.86
## 1  P1         1 1000  0.68
## 4  P4         4 1000  0.61
## 8  P8         8 1000  0.57
## 6  P6         6 1000  0.38
```

```
## selected populations
```

```
## [1] "P1" "P2" "P3" "P4" "P5" "P7" "P8"
```

```
plotA1
```

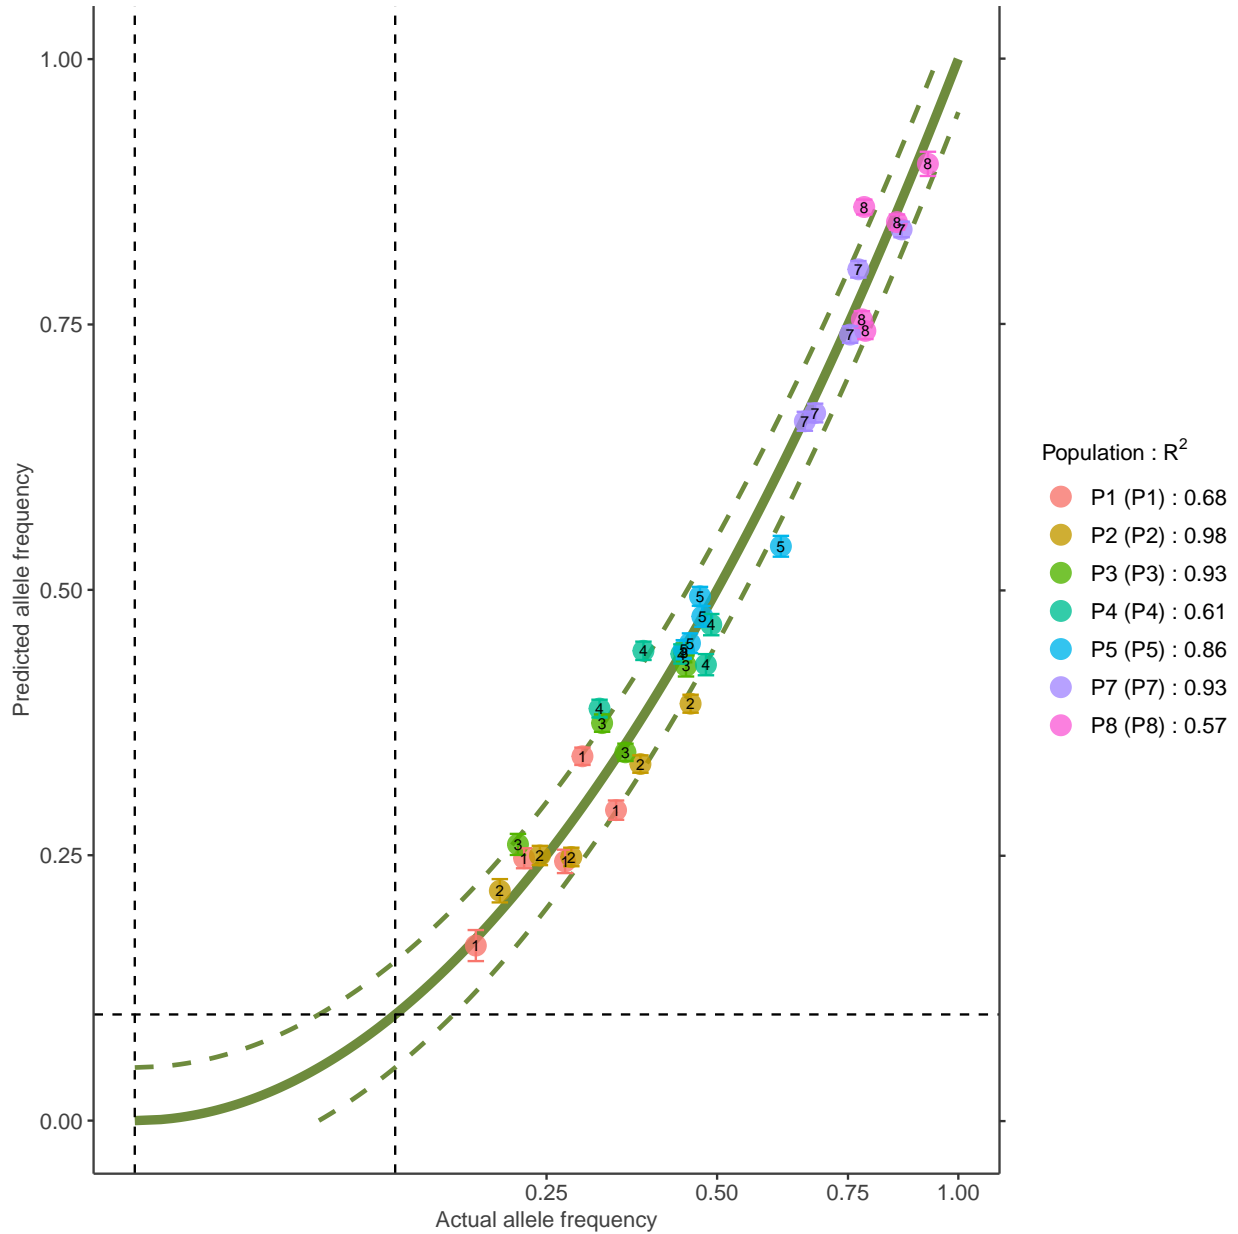

There is only one population where variation explained is less than 50 percent. This low percentage seems to be mainly a result from a narrow range in input frequencies as predicted frequencies match the overall 1:1 trend well.

```
plotA2 <- freq.ggplot(sim.freq.baseline,
  colour.Pop=TRUE,
  plot.best=FALSE,
  threshold=0.50,
  xlim=c(-0.05, 1.0),
  ylim=c(0.0, 1.0))
```

```
## Populations ordered by R2
##   Pop Pop.label   N GAM.rsq
## 2  P2           2 1000  0.98
```



```
## 3 P3      3 1000  0.93
## 7 P7      7 1000  0.93
## 5 P5      5 1000  0.86
## 1 P1      1 1000  0.68
## 4 P4      4 1000  0.61
## 8 P8      8 1000  0.57
## 6 P6      6 1000  0.38
```

```
## selected populations
```

```
## [1] "P6"
```

```
plotA2
```

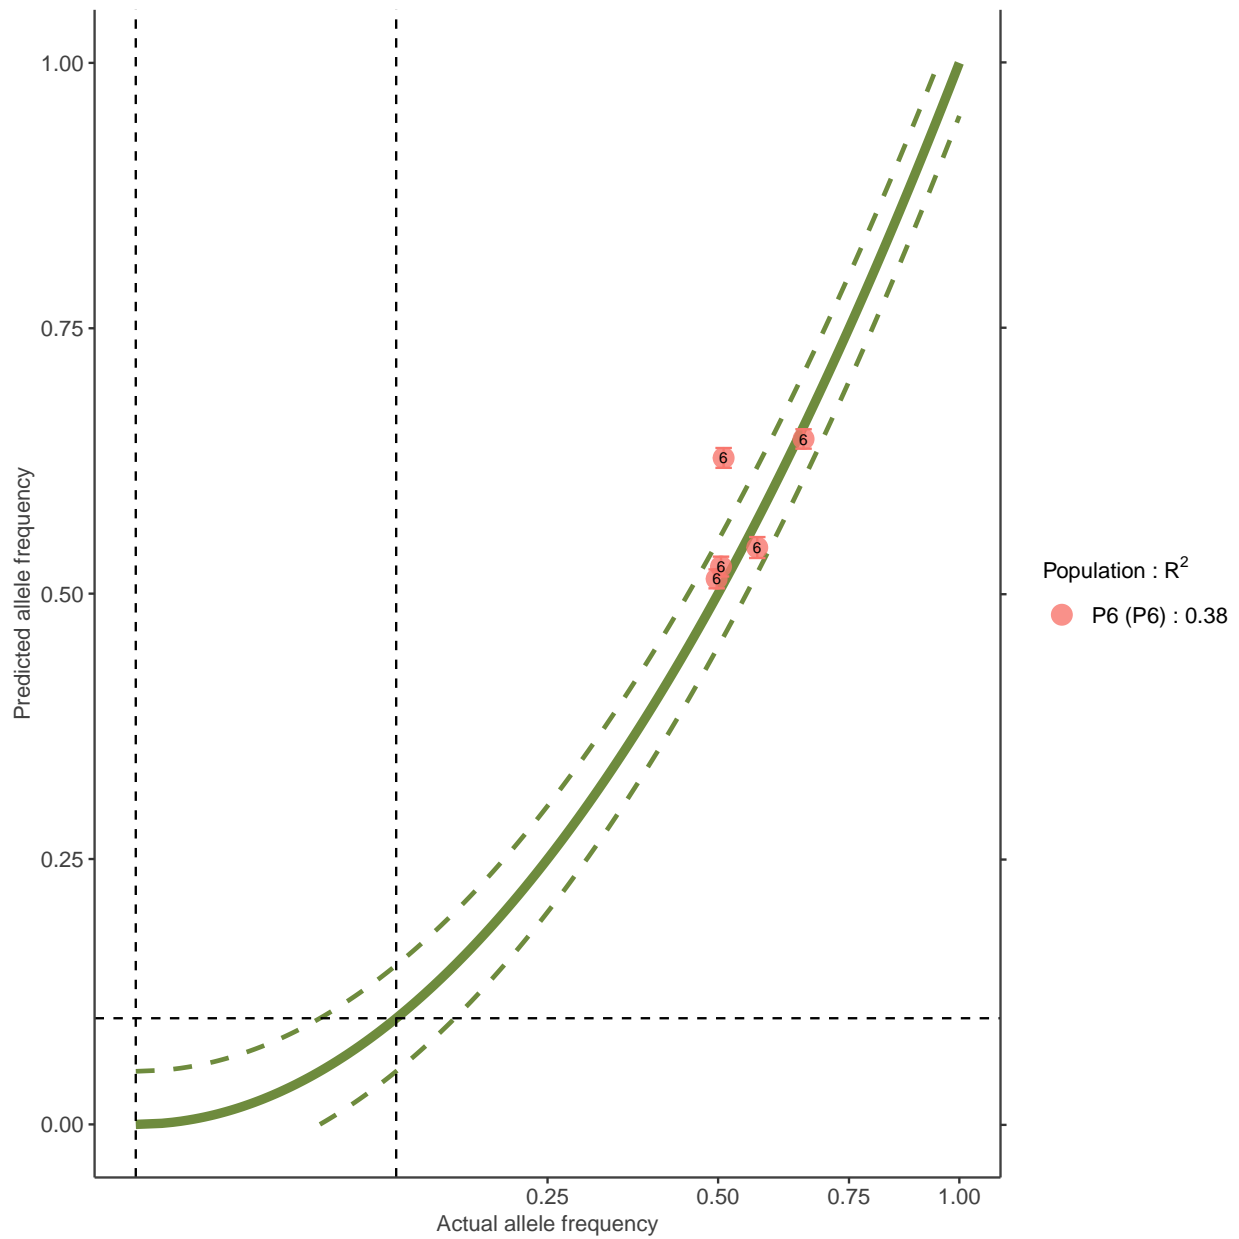

## 6 Predict future frequencies

Predictions for future climates are predicted with the models calibrated with the baseline data.

```
sim.pred.future <- count.pred(sim.count.model,
                              env.data=env.future)

sim.freq.future <- freq.pred(sim.freq.model,
                             count.predicted=sim.pred.future)
```

### 6.1 Compare predicted and simulated future frequencies

The model calibrated in this section will only be used to estimate the actual future allele frequencies. These actual allele frequencies are then used for plotting actual versus predicted (using the model calibrated with baseline frequencies) frequencies in the following figure.

```
# new calibration, just to have the input frequencies
```

```
sim.count.model2 <- count.model(future.genpop,
                                env.data=env.future)
```

```
##
## Finding allelic frequencies from a genpop object...
##
## ...done.
##
## Call:
## rda(formula = gen.comm.b ~ gradient, data = env.data)
##
## Partitioning of variance:
##           Inertia Proportion
## Total      1546374      1.0000
## Constrained   914963      0.5917
## Unconstrained 631411      0.4083
##
## Eigenvalues, and their contribution to the variance
##
## Importance of components:
##           RDA1      PC1      PC2      PC3      PC4
## Eigenvalue      9.150e+05 5.228e+05 7.337e+04 2.972e+04 5.551e+03
## Proportion Explained 5.917e-01 3.381e-01 4.745e-02 1.922e-02 3.590e-03
## Cumulative Proportion 5.917e-01 9.297e-01 9.772e-01 9.964e-01 1.000e+00
##           PC5
## Eigenvalue      4.829e-02
## Proportion Explained 3.123e-08
## Cumulative Proportion 1.000e+00
##
## Accumulated constrained eigenvalues
## Importance of components:
##           RDA1
## Eigenvalue      914963
## Proportion Explained 1
## Cumulative Proportion 1
##
```

```

## Scaling 2 for species and site scores
## * Species are scaled proportional to eigenvalues
## * Sites are unscaled: weighted dispersion equal on all dimensions
## * General scaling constant of scores: 57.35921
##
##
## Species scores
##
##      RDA1      PC1      PC2      PC3      PC4      PC5
## L1.A -0.8443 -13.188 -1.7036  1.6404 -1.7246  0.0017742
## L1.B  0.8443  13.188  1.7036 -1.6404  1.7246 -0.0017742
## L2.A -22.5031 -1.437  5.9015  0.7826  0.4149  0.0050758
## L2.B  22.5031  1.437 -5.9015 -0.7826 -0.4149 -0.0050758
## L3.A  -5.0967 -16.754 -1.5579  1.0117  1.5826 -0.0006249
## L3.B   5.0967  16.754  1.5579 -1.0117 -1.5826  0.0006249
## L4.A -12.3121 -6.870  6.1488 -0.2934 -0.4822 -0.0044681
## L4.B  12.3121  6.870 -6.1488  0.2934  0.4822  0.0044681
## L5.A -16.9904 -7.227 -0.2983 -5.2155 -0.1461  0.0014498
## L5.B  16.9904  7.227  0.2983  5.2155  0.1461 -0.0014498
##
##
## Site scores (weighted sums of species scores)
##
##      RDA1      PC1      PC2      PC3      PC4      PC5
## P1  29.406  14.870  32.362  20.1028  16.5216  -8.1527
## P2  21.894   8.109   2.086 -35.4683 -18.8144  26.8232
## P3  25.346   9.153 -33.033   6.0973 -18.8697 -32.9386
## P4   7.048 -10.833 -27.816  23.4865  19.8792  32.0444
## P5 -15.489 -27.331   0.211 -28.1481  30.5617 -19.7732
## P6 -24.179 -34.894  18.557  15.6634 -31.2401   0.5232
## P7 -22.013  20.463   3.816  -0.8668   0.9808   0.7369
## P8 -22.013  20.463   3.816  -0.8668   0.9808   0.7369
##
##
## Site constraints (linear combinations of constraining variables)
##
##      RDA1      PC1      PC2      PC3      PC4      PC5
## P1  29.442  14.870  32.362  20.1028  16.5216  -8.1527
## P2  21.846   8.109   2.086 -35.4683 -18.8144  26.8232
## P3  15.023   9.153 -33.033   6.0973 -18.8697 -32.9386
## P4   3.759 -10.833 -27.816  23.4865  19.8792  32.0444
## P5  -3.802 -27.331   0.211 -28.1481  30.5617 -19.7732
## P6  -9.762 -34.894  18.557  15.6634 -31.2401   0.5232
## P7 -28.253  20.463   3.816  -0.8668   0.9808   0.7369
## P8 -28.253  20.463   3.816  -0.8668   0.9808   0.7369
##
##
## Biplot scores for constraining variables
##
##      RDA1 PC1 PC2 PC3 PC4 PC5
## gradient -1  0  0  0  0  0
##
## Permutation test for rda under reduced model
## Permutation: free

```

```

## Number of permutations: 99
##
## Model: rda(formula = gen.comm.b ~ gradient, data = env.data)
##           Df Variance      F Pr(>F)
## Model      1  914963 8.6945  0.01 **
## Residual   6   631411
## ---
## Signif. codes:  0 '***' 0.001 '**' 0.01 '*' 0.05 '.' 0.1 ' ' 1
## Permutation test for rda under reduced model
## Terms added sequentially (first to last)
## Permutation: free
## Number of permutations: 99
##
## Model: rda(formula = gen.comm.b ~ gradient, data = env.data)
##           Df Variance      F Pr(>F)
## gradient   1  914963 8.6945  0.01 **
## Residual   6   631411
## ---
## Signif. codes:  0 '***' 0.001 '**' 0.01 '*' 0.05 '.' 0.1 ' ' 1
## Permutation test for rda under NA model
## Marginal effects of terms
## Permutation: free
## Number of permutations: 99
##
## Model: rda(formula = gen.comm.b ~ gradient, data = env.data)
##           Df Variance      F Pr(>F)
## gradient   1  914963 8.6945  0.01 **
## Residual   6   631411
## ---
## Signif. codes:  0 '***' 0.001 '**' 0.01 '*' 0.05 '.' 0.1 ' ' 1

```

```

sim.pred.future2 <- count.pred(sim.count.model2,
                              env.data=env.future)

sim.freq.plot <- sim.freq.future
sim.freq.plot$Allele.freq <- sim.pred.future2$Allele.freq

```

The comparison between projected frequencies and those sampled from the environmental gradient generally shows that projections match the expected frequencies well.

As a consequence from peculiarities of the simulated data from LEA, matches are worse for populations 7 and 8, where simulated data had lower frequencies for several alleles. Predictions for these populations were close to 1.0, which conforms more to expected frequencies of alleles that are positively correlated with the environmental gradient.

```

plotB1 <- freq.ggplot(sim.freq.plot,
                      colour.Pop=TRUE,
                      plot.best=TRUE,
                      threshold=0.50,
                      xlim=c(-0.05, 1.0),
                      ylim=c(0.0, 1.0))

```

```

## Populations ordered by R2
##   Pop Pop.label   N GAM.rsq
## 3  P3         3 1000  0.89

```

```

## 4 P4      4 1000  0.88
## 1 P1      1 1000  0.78
## 5 P5      5 1000  0.65
## 7 P7      7 1000  0.60
## 8 P8      8 1000  0.60
## 2 P2      2 1000  0.46
## 6 P6      6 1000  0.03

## selected populations
## [1] "P1" "P3" "P4" "P5" "P7" "P8"

```

plotB1

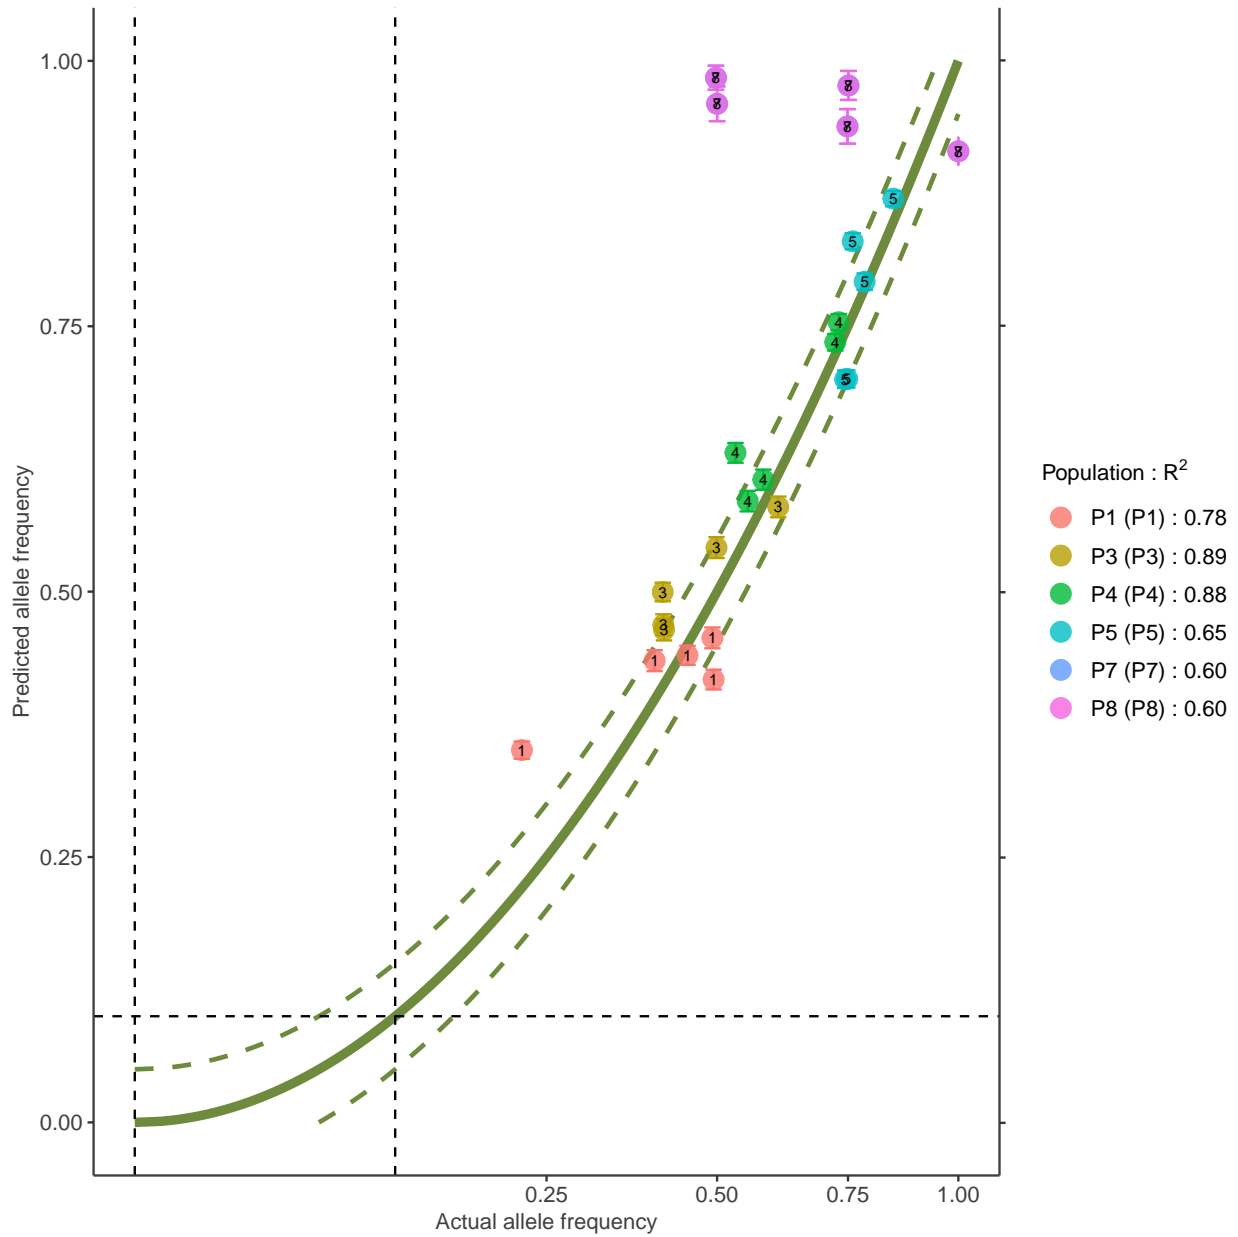

Predicted frequencies for populations 2 and 6 match the expected frequencies well. The lower percentages of explained variation are a result from the expected frequencies being close to each other, especially for

population 6.

```
plotB2 <- freq.ggplot(sim.freq.plot,  
  colour.Pop=TRUE,  
  plot.best=FALSE,  
  threshold=0.50,  
  xlim=c(-0.05, 1.0),  
  ylim=c(0.0, 1.0))
```

```
## Populations ordered by R2
```

```
##   Pop Pop.label   N GAM.rsq  
## 3  P3         3 1000   0.89  
## 4  P4         4 1000   0.88  
## 1  P1         1 1000   0.78  
## 5  P5         5 1000   0.65  
## 7  P7         7 1000   0.60  
## 8  P8         8 1000   0.60  
## 2  P2         2 1000   0.46  
## 6  P6         6 1000   0.03
```

```
## selected populations
```

```
## [1] "P2" "P6"
```

```
plotB2
```

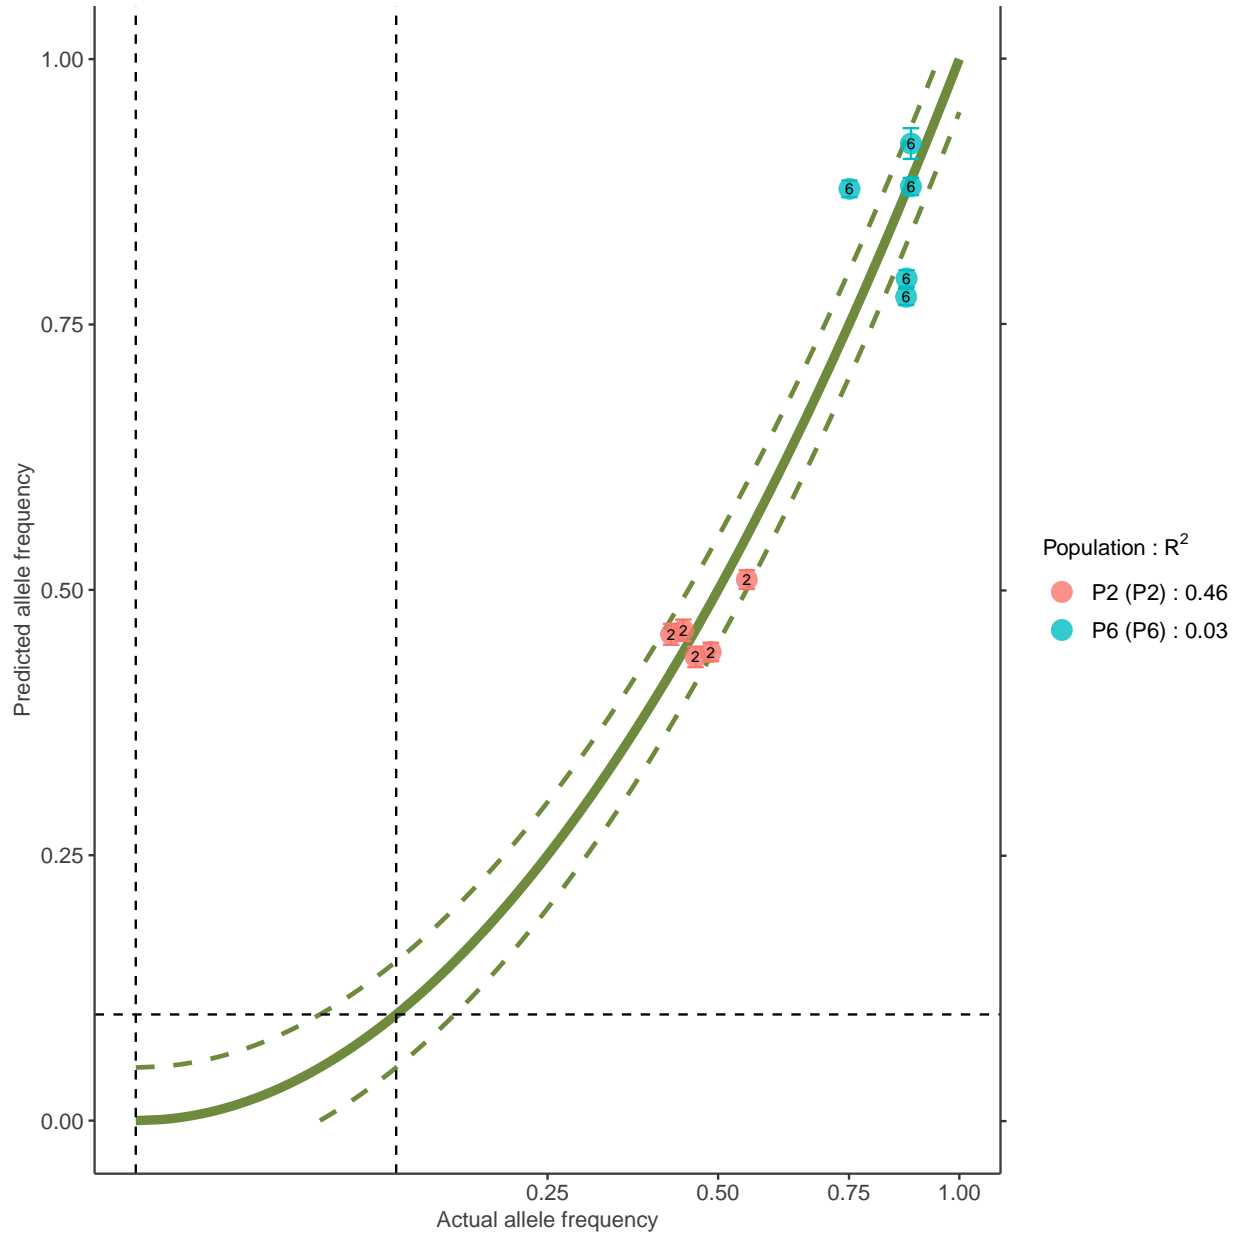

## 6.2 Plot predicted shifts in allele frequencies

Graphs show that increases in frequencies are expected for all populations and all loci. This is the expected trend for the simulated data.

```
ggdot1 <- shift.dot.ggplot(sim.freq.future)
ggdot1
```

Predicted change in allele frequencies  increasing

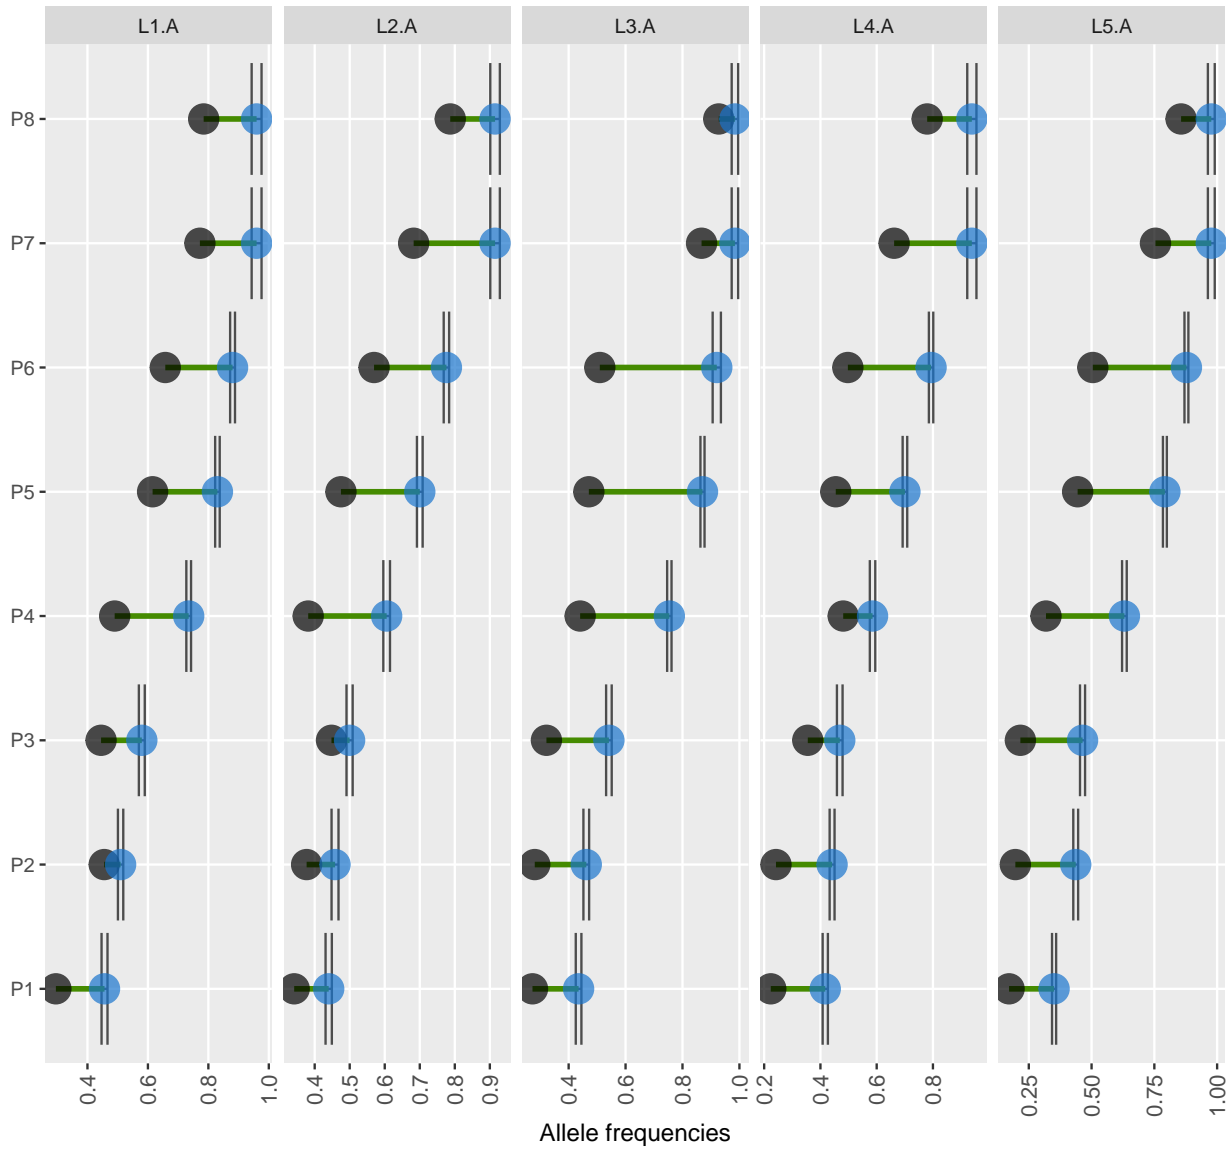

```
sim.baseline.pie <- pie.baker(sim.freq.baseline, r0=0.1)

sim.future.pie <- pie.baker(sim.freq.future, r0=0.1,
  freq.focus="Freq.e2",
  ypos=1)

ggpie1 <- shift.pie.ggplot(sim.baseline.pie,
  sim.future.pie)

ggpie1
```



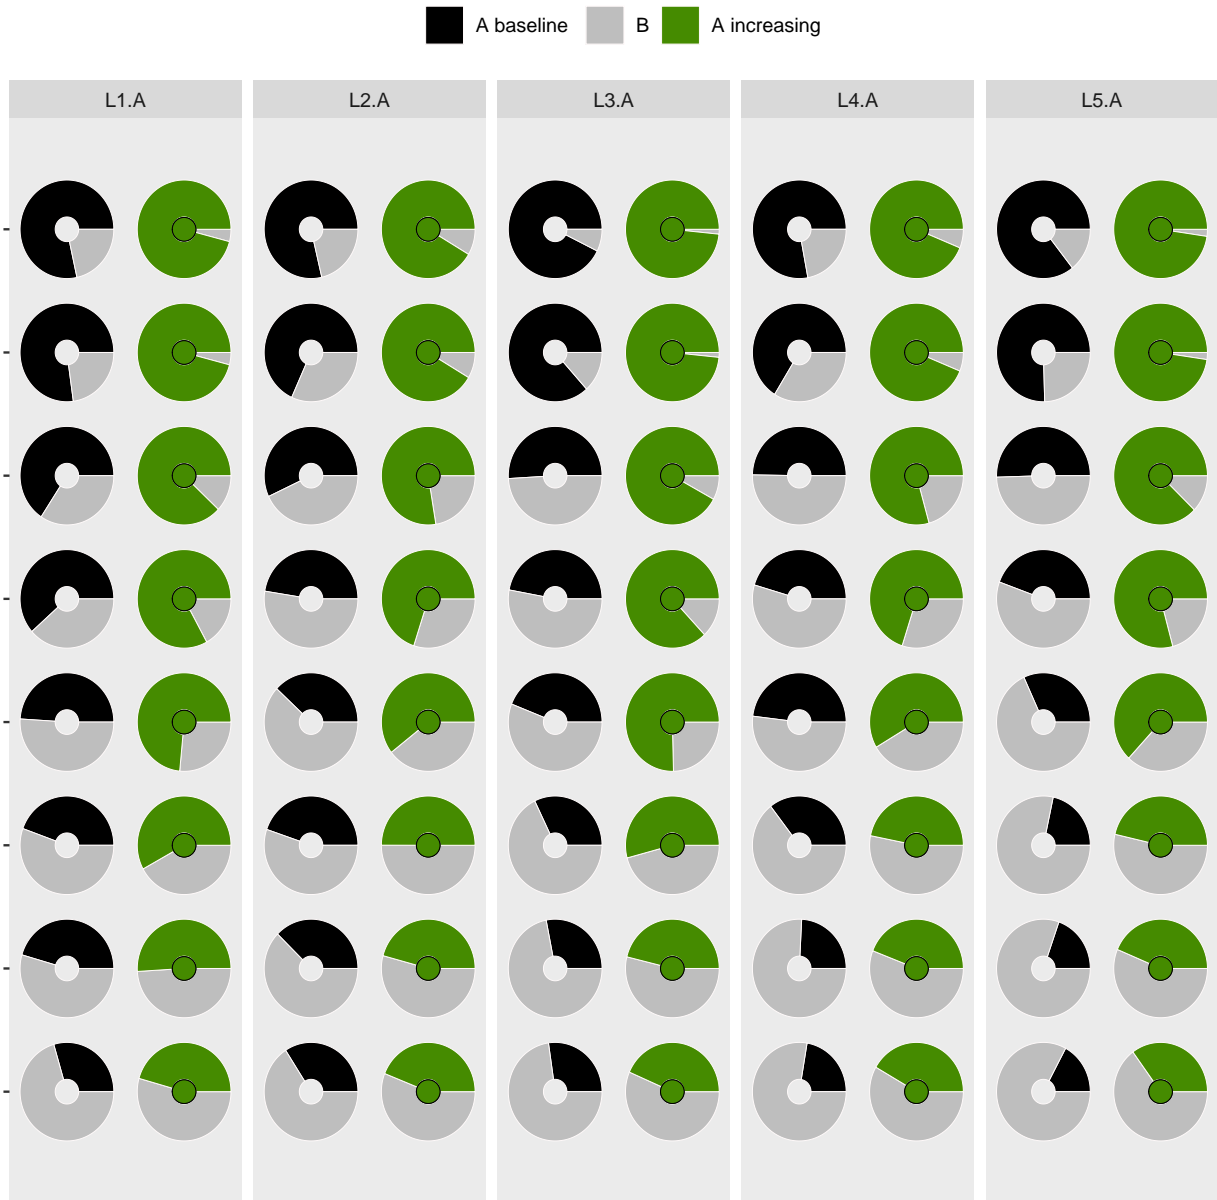

## 7 Discussion

The simulation procedure was able to retrieve the expected future trend of increasing allele frequencies associated with a shift of populations along the environmental gradient.

This positive trend was predicted for all populations, despite some peculiarities of the simulated data in not having monotonous increments in allele frequencies in the simulated data sets.
